# Supplementary material
Source: publisher figshare collection journal article supplement (https://future-science-group.figshare.com/ndownloader/files/34256696)
Supplement: Supplementary file 1 [file 34256696]

**SUPPLEMENTARY MATERIALS**

**Systematic literature review of evidence in amyloid light-chain amyloidosis**

**CONTENTS**

[**Table S1.** Clinical evidence literature search: inclusion/exclusion criteria. 2](#_Toc80800939)

[**Table S2.** HRQoL evidence literature search: inclusion/exclusion criteria. 3](#_Toc80800940)

[**Table S3.** Economic evidence literature search: inclusion/exclusion criteria. 4](#_Toc80800941)

[**Table S4.** Resource use/indirect costs evidence literature search: inclusion/exclusion criteria. 5](#_Toc80800942)

[**Table S5.** Search strategy for clinical evidence review: MEDLINE and EMBASE 6](#_Toc80800943)

[**Table S6.** Search strategy for clinical evidence review: Cochrane Library (Ovid) 13](#_Toc80800944)

[**Table S7.** Search strategy for the health-related quality of life evidence review 16](#_Toc80800945)

[**Table S8.** Search strategy for economic evidence review 21](#_Toc80800946)

[**Table S9.** Search strategy for resource use and indirect costs evidence review 23](#_Toc80800947)

[**Table S10.** Risk of bias assessment of randomized controlled trials 28](#_Toc80800948)

[**Table S11.** Risk of bias assessment across observational studies (case-control studies) 28](#_Toc80800949)

[**Table S12.** Risk of bias assessment across observational studies (cohort studies) 29](#_Toc80800950)

[**Table S13.** Risk of bias assessment across HRQoL studies 31](#_Toc80800951)

**Table S1.** Clinical evidence literature search: inclusion/exclusion criteria.

| **Item** | **Inclusion criteria** | **Exclusion criteria** |
| --- | --- | --- |
| **Population** | Study populations:   - Humans only; women and men - ≥18 years of age - Newly diagnosed with AL amyloidosis - Treatment naïve or requiring first-line/front-line treatment | Study populations:   - Non-human - <18 years of age - Other forms of amyloidosis (eg, senile, familial/hereditary, and secondary), multiple myelomas, or lymphomas as primary diagnosis - Previously treated, relapsed, or heavily pre-treated patients |
| **Interventions/ Comparators** | - Daratumumab + VCd - VCd, or any combinations of the following chemotherapies: melphalan, cyclophosphamide, bendamustine, bortezomib, lenalidomide, pomalidomide, thalidomide, dexamethasone, melphalan–dexamethasone - Ixazomib, methylprednisolone, prednisolone, prednisone, carfilzomib, doxycycline - Placebo | - - Non-pharmacological treatments (eg, ASCT)   - Daratumumab used as monotherapy   - Treatments used in subsequent treatment lines |
| **Outcomes** | - NA | - NA |
| **Study design** | - Published phase II, II/III, and III RCTs - Non-randomized, single-arm, or observational studies | - Pre-clinical studies, case reports, expert opinion articles, letters, narrative (non-systematic) reviews - Open-label extension phases of RCTs - Pilot studies - Phase 1 and phase 1/2 RCTs - Phase 4 studies |
| **Study language** | - All articles in English | - Non-English articles |
| **Date restrictions** | - Full-text studies published in 2005 or later - Conference abstracts and posters from the last 2 years (Jan 2019 and later) | - Published studies dated earlier than 2005 - Conference abstracts and posters prior to 2019 |

Abbreviations: AL = amyloid light-chain; ASCT = autologous stem cell transplant; NA = not applicable; RCT = randomized controlled trial; VCd = bortezomib + cyclophosphamide + dexamethasone.

**Table S2.** HRQoL evidence literature search: inclusion/exclusion criteria.

| **Item** | **Inclusion criteria** | **Exclusion criteria** |
| --- | --- | --- |
| **Population** | Study populations:   - Humans only; women and men - ≥18 years of age - AL amyloidosis | Study populations:   - Non-human - <18 years of age - Other forms of amyloidosis (eg, senile, familial/hereditary, and secondary), multiple myelomas, or lymphomas as primary diagnosis |
| **Interventions/ Comparators** | - All interventions | - NA |
| **Outcomes** | - Direct utility values, equations used to derive utility values, or utility increments/decrements - Includes EQ-5D (3L or 5L), EORTC QLQ-C30, SF-36v2, SF-6D or HUI values - Includes utility values for baseline or specific health states (eg, for responders, non-responders, etc.) - Utility mapping or equations used to derive utility values based on any other outcomes | **Title and abstract screening phase**   - Studies that do not report utility values or HRQoL   **Full-text screening phase**   - Studies that report only HRQoL measures other than EQ-5D, EORTC QLQ-C30, SF-36, SF-6D, or HUI |
| **Study design** | - Any RCTs or observational studies reporting utility values (EQ-5D [3L or 5L], EORTC QLQ-C30, SF-36v2, SF-6D, or HUI) - Any utility elicitation studies (eg, TTO, SG, VAS) - Any CUAs reporting utility values used in their analysis - Any studies reporting utility mapping or regression equations used to derive utility values - Conference abstracts reporting utility values or equations | **Full-text screening phase**   - Editorials, letters, news articles |
| **Study language** | - Articles in English | - Non-English articles |
| **Date restrictions** | - Conference abstracts and posters from the last 2 years (Jan 2019 and later) | - Conference abstracts and posters before 2019 |

Abbreviations: AL = amyloid light-chain; CUA = cost-utility analysis; EORTC QLQ-C30 = European Organization for the Research and Treatment of Cancer Quality of Life Questionnaire; HRQoL = health-related quality of life; HUI = Health Utility Index; NA = not applicable; RCT = randomized controlled trial; SF-6D = Short-Form 6-Dimension Health Survey; SF-36v2 = Short-Form 36-Item Health Survey version 2; SG = standard gamble; TTO = time trade-off; VAS = visual analog scale.

**Table S3.** Economic evidence literature search: inclusion/exclusion criteria.

| **Item** | **Inclusion criteria** | **Exclusion criteria** |
| --- | --- | --- |
| **Population** | Study populations:   - Humans only; women and men - ≥18 years of age - AL amyloidosis | Study populations:   - Non-human - <18 years of age - Other forms of amyloidosis (eg, senile, familial/hereditary, and secondary), multiple myelomas, or lymphomas as primary diagnosis |
| **Interventions/ Comparators** | - All interventions | - - Studies that do not report costs or economic evaluations |
| **Outcomes** | - Include any studies reporting costs or economic evaluations | - Studies that do not report costs or economic evaluations |
| **Study design** | **Title and abstract screening phase**   - Any cost-effectiveness analyses (cost-utility analysis, cost-benefit analysis, cost-consequence cost-minimization analysis, cost per responder) - Any cost-of-illness or economic burden of illness studies - Any budget impact analyses - HTA submissions or responses to economic evaluations (eg, NICE, CADTH, PBAC, ICER, Korean HTA, Nordic HTAs)   **Full-text screening phase**   - Cost-utility analyses (ie, model outcomes reported as cost-per-QALY) - Any cost-effectiveness analyses that were not cost-utility analyses (eg, cost-effectiveness not expressed as cost/QALY, cost-benefit analysis, cost-consequence, cost-minimization analysis, cost per responder) - HTA submissions or assessments of CUAs (with sufficient detail to assess model design) | **Title and abstract screening phase**   - Non-economic studies - Systematic literature reviews of economic studies   **Full-text screening phase**   - Any cost-of-illness, economic burden of illness, or budget impact analyses - Sufficient information not provided in the study to understand model used for analysis (ie, brief summaries of economic analyses from HTA reports) |
| **Study language** | - All articles in English | - Non-English articles |
| **Date restrictions** | - Conference abstracts and posters from the last 2 years (Jan 2019 and later) | - Conference abstracts and posters prior to 2019 |

Abbreviations: AL = amyloid light-chain; CADTH = Canadian Agency for Drugs and Technologies in Health; CUA = cost-utility analysis; HTA = health technology assessment; ICER = Institute for Clinical and Economic Review; NICE = National Institute for Health and Care Excellence; PBAC = Pharmaceutical Benefits Advisory Committee; QALY = quality-adjusted life year.

**Table S4.** Resource use/indirect costs evidence literature search: inclusion/exclusion criteria.

| Item | Inclusion criteria | Exclusion criteria |
| --- | --- | --- |
| **Population** | Study populations:   - Humans only; women and men - ≥18 years of age - AL amyloidosis | Study populations:   - Non-human - <18 years of age - Other forms of amyloidosis (eg, senile, familial/hereditary, and secondary), multiple myelomas, or lymphomas as primary diagnosis |
| **Interventions/Comparators** | - All interventions | - None |
| **Outcomes** | - Include any studies reporting direct (medical) or indirect (productivity loss) costs - Include studies that report resource use (eg, ER visits, inpatient, outpatient, etc.) as well as studies reporting costs associated with resource use | - Studies that do not report direct (medical), indirect (productivity loss) costs, or resource use |
| **Study design** | - Systematic literature reviews of economic studies that report costs - Any cost-of-illness or economic burden of illness - Any cost-effectiveness analyses or budget impact analyses reporting cost values used in their analysis - HTA submissions or assessments of costing/economic analyses (eg, NICE, CADTH, PBAC, ICER, Korean HTA, Nordic HTAs) with sufficient detail to assess model cost inputs | - Non-economic studies |
| **Study language** | Articles in English | All non-English articles |
| **Date restrictions** | - Publications from 2010 onwards - Conference abstracts and posters from the last 2 years (Jan 2019 and later) | - Publications prior to 2010 - Conference abstracts and posters before Jan 2019 |

Abbreviations: AL = amyloid light-chain; CADTH = Canadian Agency for Drugs and Technologies in Health; ER = emergency room; HTA = health technology assessment; ICER = Institute for Clinical and Economic Review; NICE = National Institute for Health and Care Excellence; PBAC = Pharmaceutical Benefits Advisory Committee.

**Table S5.** Search strategy for clinical evidence review: MEDLINE and EMBASE.

Database(s): Embase 1974 to 2021 February 11, Ovid MEDLINE(R) and Epub Ahead of Print, In-Process & Other Non-Indexed Citations and Daily 1946 to February 10, 2021.

| **#** | **Searches** | **Results** |
| --- | --- | --- |
| 1 | exp amyloidosis/ or Plaque, Amyloid/ or (amyloid$ or beta-amyloid$ or paraamyloid$ or beta fibrillosi$ or (amyloid$ adj3 (AL or light-chain or Primary or Systemic or senile or abeta or fibril? or tumo?r or deposit? or plaque?)) or (amyloid adj2 (neuropathy or neuropathies)) or cerebral amyloid? angiopath$ or (abeta adj4 amyloid*) or Famil$ Mediterranean fever? or (muckle wells adj2 (syndrome$ or disease?)) or (neuritic plaque? or senile plaque?)).ti,ab,kw,kf. [Amyloidosis Terms] | 260057 |
| 2 | 71050168A2.rn. or ixazomib.ti,ab,kw,kf,nm. or (min 2238 or min2238).ti,ab,kw,kf. [Ixazomib Terms] | 1295 |
| 3 | Prednisolone/ or (adelcort or antisolon or antisolone or aprednislon or aprednislone or benisolon or benisolone or berisolon or berisolone or caberdelta or capsoid or co hydeltra or codelcortone or compresolon or cortadeltona or cortadeltone or cortalone or cortelinter or cortisolone or cotolone or dacortin or dacortin h or dacrotin or decaprednil or decortin h or decortril or dehydro cortex or dehydro hydrocortison or dehydro hydrocortisone or dehydrocortex or dehydrocortisol or dehydrocortisole or dehydrohydrocortison or dehydrohydrocortisone or delcortol or delta 1 17 hydroxycorticosterone 21 acetate or delta 1 hydrocortisone or delta cortef or delta cortril or delta ef cortelan or delta f or delta hycortol or delta hydrocortison or delta hydrocortisone or delta ophticor or delta stab or delta-cortef or delta1 dehydrocortisol or delta1 dehydrohydrocortisone or delta1 hydrocortisone or deltacortef or deltacortenolo or deltacortil or deltacortoil or deltacortril or deltaderm or deltaglycortril or deltahycortol or deltahydrocortison or deltahydrocortisone or deltaophticor or deltasolone or deltastab or deltidrosol or deltisilone or deltisolon or deltisolone or deltolasson or deltolassone or deltosona or deltosone or depo-predate or dermosolon or dhasolone or di adreson f or di adresone f or di-adreson-f or diadreson f or diadresone f or dicortol or domucortone or encortelon or encortelone or encortolon or equisolon or fernisolone-p or glistelone or hefasolon or hostacortin h or hostacortin h vet or hydeltra or hydeltrone or hydrelta or hydrocortancyl or hydrocortidelt or hydrodeltalone or hydrodeltisone or hydroretrocortin or hydroretrocortine or inflanefran or insolone or keteocort h or key-pred or key-pred sp or lenisolone or leocortol or liquipred or lygal kopftinktur n or mediasolone or meprisolon or meprisolone or metacortalon or metacortalone or metacortandralon or metacortandralone or metacortelone or meti derm or meti-derm or meticortelone or metiderm or morlone or mydrapred or neo delta or nisolon or nisolone or nsc 9120 or nsc9120 or opredsone or panafcortelone or panafcortolone or panafort or paracortol or phlogex or pre cortisyl or preconin or precortalon or precortancyl or precortisyl or pred-ject-50 or predacort 50 or predaject-50 or predalone 50 or predartrina or predartrine or predate or predeltilone or predisole or predisyr or predne dome or prednecort or prednedome or prednelan or predni coelin or predni h tablinen or predni-helvacort or prednicoelin or prednicort or prednicortelone or prednifor drops or predniment or predniretard or prednis or prednisil or prednisolone? or prednivet or prednorsolon or prednorsolone or predonine or predorgasolona or predorgasolone dione or prelon or prelone or prenilone or prenin or prenolone or preventan or prezolon or rubycort or scherisolon or scherisolona or serilone or solondo or solone or solupren or soluprene or spiricort or spolotane or sterane or sterolone or supercortisol or supercortizol or taracortelone or walesolone or wysolone).ti,ab,kw,kf,nm. [Prednisolone Terms] | 186168 |
| 4 | fluprednisolone/ or methylprednisolone/ or methylprednisolone acetate/ or methylprednisolone hemisuccinate/ or prednimustine/ or (fluprednisolon$ or methylprednisolon$ or prednimustin$ or Alphadrol or b 673 or b673 or lukrutor or nsc 47439 or nsc47439).ti,ab,kw,kf,nm. [Prednisolone narrower Terms] | 137699 |
| 5 | Doxycycline/ or (Doxycyclin$ or BMY-28689 or BMY 28689 or BMY28689 or BU-3839T or BU 3839T or BU3839T or Doryx or Alpha-6-Deoxyoxytetracycline or Alpha 6 Deoxyoxytetracyclin? or Hydramycin? or Periostat or Vibra-Tabs or Vibra Tabs or Vibramycin? or adoxa or alpha 6 desoxy 5 oxytetracycline or amermycin or atrax or Atridox or azudoxat or bactidox or banndoclin or basedillin or bassado or biocolyn or biodoxi or bronmycin or calcium doxycycline or cloran or cyclidox or dentistar or deoxycycline or deoxymycin dispersal or deoxymykoin or deoxyoxytetracycline or desoxy oxytetracycline or desoxycycline or doinmycin or dosil or dotur or doxaciclin or doxacycline or doxat or doxatet or doxi-sergo or doxibiotic or doxicycline or doxilin or doximed or doximycin or doxin or doxine or doxocycline or doxsig or doxy or doxy 100 or doxy II or doxy m or doxy n tablinen or doxy p ratiopharm or doxy puren or doxy s or doxy tablinen or doxy-1 or doxy-caps or doxybiocin or doxycen or doxycen retard or doxychel or doxycin or doxycyclin or doxycycline calcium or doxycycline hydrate or doxycycline hydrochloride or doxycycline monohydrate or doxycycline ratiopharm or doxycydine monohydrate or doxylag or doxylin or doxymycin or doxypuren or doxytec or doxytrim or dumoxin or duracycline or esdoxin or etidoxina or gewacyclin or gs 3065 or ibralene or idocyclin or idocyklin or interdoxin or investin or longamycin or lydox or magdrin or medomycin or mespafin or mildox or miraclin or monodox or nordox or nsc 56228 or oracea or paldomycin or pernox gel or radox or remycin or respidox or roximycin or serodoxy or servidoxine or servidoxyne or siadocin or siclidon or sigadoxin or spanor or supracyclin or supramycina or tenutan or tolexine or tolexine ge or torymycin or tsurupioxin or unidox or veemycin or viadoxin or vibra s or vibrabiotic or vibracina or vibradox or vibramicin? or vibraveineuse or vibravenos or vibravenos sf or vibravet or viradoxyl-n or wanmycin or zadorin or zenavod).ti,ab,kw,kf,rn. [Doxycycline Terms] | 76416 |
| 6 | (daratumumab$ or darzalex* or JNJ 54767414 or 945721-28-8 or 4Z63YK6E0E or ((CD38 or CD-38) adj2 (monoclonal antibod* or mab or moab or humax))).ti,ab,kw,kf,rn. [Daratumumab Terms] | 4165 |
| 7 | Cyclophosphamide/ or (CyBorD or Cy-Bor-D or cyclophosphamid$ or alkyroxan$ or carloxan$ or ciclofosfamida$ or ciclolen$ or ciclophosphamid$ or cicloxal$ or clafen$ or claphen$ or cyclo-cell$ or cycloblastin$ or cyclofos amid$ or cyclofosfamid$ or cyclofosfamid$ or cyclophar$ or cyclophosphan$ or cyclophosphoramid$ or cyclostin$ or cycloxan$ or cyklofosfamid$ or cyphos$ or cytophosphan$ or cytoxan$ or endocyclo phosphat$ or endoxan$ or endoxanal$ or endoxon-asta$ or enduxan$ or genoxal$ or ledoxan$ or ledoxina$ or mitoxan$ or neosan$ or neosar$ or noristan$ or procytox$ or semdoxan$ or sendoxan$ or syklofosfamid$ or zyklophosphamid$ or ASTA B518 or b 518 or b518 or "BRN 0011744" or CB 4564 or CCRIS 188 or CCRIS 7469 50-18-0 or EINECS 200-015-4 or HSDB 3047 or NCI-C04900 or nsc 26271 or nsc 2671 or NSC-26271 or 60007-95-6 or 6055-19-2$or 75526-90-8 or AI3-26198 or 6UXW23996M or 8N3DW7272P or SK 2050).ti,ab,kw,kf,rn. [Cyclophosphamide Terms] | 322606 |
| 8 | Bortezomib/ or (bortezomib$ or HSDB 7666 or ldp 341 or ldp341 or mg 341 or mg341 or mln 341 or mln341 or NSC 681239 or PS 341 or ps341 or Velcad$ or 179324-69-7 or 197730-97-5 or 69G8BD63PP).ti,ab,kw,kf,rn. [Bortezomib Terms] | 42657 |
| 9 | Dexamethasone/ or (dexamethasone$ or adrecort or adrenocot or aeroseb dex or aeroseb-d or aeroseb-dex or aflucoson or aflucoson or AI3-50934 or alfalyl or anaflogistico or aphtasolon or arcodexan or arcodexan or artroson or auxiron or azium or bidexol or bisu ds or calonat or CCRIS 7067 or cebedex or cetadexon or colofoam or corsona or corson or cortastat or cortidex or cortidexason or cortidrona or cortidron or cortisumman or dacortina fuert or dacortine fuert or dalalon or danason or de-sone la or decacortin or decadeltosona or decadeltoson or decaderm or decadion or decadran or decadron or decadronal or decadron or decaesadril or decagel or decaject or decalix or decameth or decamethason or decason or decaspray or decasterolon or decdan or decilon or decofluor or dectancyl or dekacort or delladec or deltafluoren or deltafluoren or dergramin or deronil or desacort or desacorton or desadren or desalark or desametason or desamethason or desameton or desameton or deseronil or desigdron or dex-id or dexa cortidelt or dexa cortisyl or dexa dabrosan or dexa korti or dexa mamallet or dexa scherosan or dexa scherozon or dexa scherozon or dexa-p or dexa-sin or dexac or dexachel or dexacidin or dexacort or dexacortal or dexacorten or dexacortin or dexacortisyl or dexadabroson or dexadecadrol or dexadelton or dexadrol or dexafarma or dexagel or dexagen or dexahelvacort or dexakorti or dexalien or dexalocal or dexalona or dexam or dexamecortin or dexameson or dexameson or dexametason or dexametasona or dexametason or dexameth or dexamethason or dexamethasonum or dexamethazon or dexamethazon or dexamethonium or dexamonozon or dexan or dexan or dexano or dexapolcort or dexapos or dexapot or dexaprol or dexascheroson or dexascherozon or dexascherozon or dexason or dexason or dexinolon or dexinoral or dexionil or dexmethson or dexona or dexon or dexpak or dextelan or dextenza or dextrason or dexycu or dezon or dibasona or dinormon or doxamethason or DXMS or EINECS 200-003-9 or esacorten or exadion or exadion or firmalon or fluormethyl prednisolon or fluormethylprednisolon or fluormon or fluorocort or fluorodelta or fluoromethylprednisolon or fortecortin or gammacorten or gammacorten or grosodexon or grosodexon or hexadecadiol or hexadecadrol or hexadiol or hexadrol or HL-Dex or HSDB 3053 or isnacort or isopto dex or isopto maxidex or isoptodex or isoptomaxidex or lokalison f or loverin or luxazon or marvidion or maxidex or maxitrol or mediamethason or megacortin or mephameson or metasolon or methazon* ion or methazonion or methazonion or methylfluorprednisolon or metisone lafi or mexason or mexidex or millicorten or millicortenol or mk 125 or mk125 or mymethason or neoforderx or neofordex or nisomethasona or novocort or nsc 34521 or nsc34521 or ocu-trol or oftan-dexa or opticorten or opticortinol or oradexan or oradexon or oradexon or orgadron or osurdex or OTO-104 or ozurdex or pidexon or policort or posurdex or predni-f or prednisolon* f or prodexon or sanamethason or santenson or sawason or solurex or spoloven or sterason or sunia sol d or superprednol or thilodexin or tobradex or triamcimetil or turbinair or vexamet or visumetazon or visumethazon or 1950-02-02 or 1050677-47-8 or 137098-19-2 or 7S5I7G3JQL or 8054-59-9 or 906362-70-7 or 906422-84-2).ti,ab,kw,kf,rn. [Dexamethasone Terms] | 245294 |
| 10 | stem cell transplantation/ or cord blood stem cell transplantation/ or hematopoietic stem cell transplantation/ or peripheral blood stem cell transplantation/ or mesenchymal stem cell transplantation/ or (stem cell? adj2 (therap$ or transplant$)).ti,ab,kw,kf,rn. [Stem Cell Transplantation Terms] | 277983 |
| 11 | Melphalan/ or (melphalan$ or alanine nitrogen mustard$ or alkeran$ or alkerana$ or AT-290 or BRN 2816456 or CB 3025 or cb3025 or CCRIS 374 or chloroethylaminophenylalanin$ or EINECS 205-726-3 or evomela$ or HSDB 3234 or l pam or phenylalanine mustard$ or sarcolysin$ or l-sarcolysin$ or l-sarkolysin$ or levo phenylalanine mustard$ or levo sarcolysin$ or levofalan$ or levofolan$ or levopholan$ or medphalan$ or melfalan$ or melfalano$ or melphalanum$ or melphalon$ or melphelan$ or merphalan$ or NCI-C04853 or NSC 241286 or NSC 8806 or nsc8806 or phenylalanine 2037 or phenylalanine$ mustard$ or phenylalanine$ nitrogen mustard$ or RCRA waste number U150 or sarcolysin$ or sarkolysin$ or SK 15673 or 148-82-3$ or 8057-25-8 or Q41OR9510P).ti,ab,kw,kf,rn. [Mephalan Terms] | 52347 |
| 12 | (MDex or M-Dex or BMDEx or B-M-Dex).ti,ab,kw,kf,rn. [Combinations: melphalan and dexamethasone (MDex); MDex and bortezomib (BMDex) Terms] | 443 |
| 13 | Bendamustine Hydrochloride/ or (bendamustin* or bendeka* or cimet 3393 or cytostasan$ or cytostasan$ or HSDB 7763 or IMET 3393 or levact$ or ribomustin$ or ribovact$ or SDX 105 or treanda or zimet 3393 or zimet3393 or 16506-27-7 or 3543-75-7 or 9266D9P3PQ or 981Y8SX18M).ti,ab,kw,kf,rn. [Bendamustine Terms] | 8821 |
| 14 | Lenalidomide/ or (lenalidomid$ or cc-5013 or cc5013 or cdc 501 or cdc 5013 or cdc501 or cdc5013 or "enmd 0997" or enmd0997 or f0p408n6v4 or hsdb 8220 or imid 3 or imid3 or revimid$ or revlimid$ or 191732-72-6 or 346670-73-3 or 443912-14-9 or F0P408N6V4).ti,ab,kw,kf,rn. [Lenalidomide Terms] | 25922 |
| 15 | Thalidomide/ or (thalidomid$ or actimid$ or ai3-50606 or algosediv$ or asidon 3 or asmadion$ or asmaval$ or bonbrain$ or "brn 0030233" or calmor$ or calmorex$ or ccris 8148 or contergan$ or corronarobetin$ or distaval$ or e-217 or ectiluran$ or einecs 200-031-1 or "enmd 0995" or enterosediv$ or gastrinid$ or glupan$ or glutanon$ or grippex$ or hippuzon$ or hsdb 3586 or imida-lab$ or imidan$ or imiden$ or isomin$ or k 17 or kedavon$ or kevadon$ or neaufatin$ or neosedyn$ or neosydyn$ or nerosedyn$ or neufatin$ or neurodyn$ or neurosedin$ or neurosedym$ or neurosedyn$ or nevrodyn$ or nibrol$ or noctosediv$ or noxodyn$ or nsc 527179 or nsc 66847 or pangul$ or pantosediv$ or poly-giron$ or polygripan$ or predni-sediv$ or pro-bam m$ or pro-ban m$ or profarmil$ or psycholiquid$ or psychotablets$ or quetimid$ or quietoplex$ or sandormin$ or sedalis$ or sedalis sedi-lab$ or sedimid$ or sedin$ or sedisperil$ or sedoval$ or shin naito$ or shinnibrol$ or sleepan$ or slipro$ or softenil$ or softenon$ or synovir$ or talargan$ or talidomida$ or talidomid$ or talimol$ or talismol$ or talizer$ or telagan$ or telargan$ or telargean$ or tensival$ or thado$ or thalimodid$ or thalin$ or thalinett$ or thalix$ or thalomid$ or thalomid$ or theophilcholin$ or ulcerfen$ or valgis$ or valgrain$ or yodomin$ or 14088-68-7 or 4Z8R6ORS6L or 50-35-1 or 731-40-8 or 4Z8R6ORS6L).ti,ab,kw,kf,rn. [Thalidomide Terms] | 44280 |
| 16 | pomalidomid$.ti,ab,kw,kf,nm. | 3050 |
| 17 | (carfilzomib? or Kyprolis or pr 171 or pr171).ti,ab,kw,kf,nm. | 4122 |
| 18 | or/2-17 [All Drug Terms - MEDLINE] | 1158667 |
| 19 | 1 and 18 | 9336 |
| **20** | **19 use ppez [Amyloidosis Terms AND All Drug Terms - MEDLINE]** | **2351** |
| 21 | exp amyloidosis/ or AL amyloidosis/ or amyloidosis/ or Plaque, Amyloid/ or (amyloid$ or beta-amyloid$ or paraamyloid$ or beta fibrillosi$ or (amyloid$ adj3 (AL or light-chain or Primary or Systemic or senile or abeta or fibril? or tumo?r or deposit? or plaque?)) or (amyloid adj2 (neuropathy or neuropathies)) or cerebral amyloid? angiopath$ or (abeta adj4 amyloid*) or Famil$ Mediterranean fever? or (muckle wells adj2 (syndrome$ or disease?)) or (neuritic plaque? or senile plaque?)).ti,ab,kw. [Amyloidosis Terms] | 259841 |
| 22 | ixazomib/ or ixazomib citrate/ or (71050168A2 or ixazomib or (min 2238 or min2238)).ti,ab,kw,rn. [Ixazomib Terms] | 2099 |
| 23 | Prednisolone/ or (adelcort or antisolon or antisolone or aprednislon or aprednislone or benisolon or benisolone or berisolon or berisolone or caberdelta or capsoid or co hydeltra or codelcortone or compresolon or cortadeltona or cortadeltone or cortalone or cortelinter or cortisolone or cotolone or dacortin or dacortin h or dacrotin or decaprednil or decortin h or decortril or dehydro cortex or dehydro hydrocortison or dehydro hydrocortisone or dehydrocortex or dehydrocortisol or dehydrocortisole or dehydrohydrocortison or dehydrohydrocortisone or delcortol or delta 1 17 hydroxycorticosterone 21 acetate or delta 1 hydrocortisone or delta cortef or delta cortril or delta ef cortelan or delta f or delta hycortol or delta hydrocortison or delta hydrocortisone or delta ophticor or delta stab or delta-cortef or delta1 dehydrocortisol or delta1 dehydrohydrocortisone or delta1 hydrocortisone or deltacortef or deltacortenolo or deltacortil or deltacortoil or deltacortril or deltaderm or deltaglycortril or deltahycortol or deltahydrocortison or deltahydrocortisone or deltaophticor or deltasolone or deltastab or deltidrosol or deltisilone or deltisolon or deltisolone or deltolasson or deltolassone or deltosona or deltosone or depo-predate or dermosolon or dhasolone or di adreson f or di adresone f or di-adreson-f or diadreson f or diadresone f or dicortol or domucortone or encortelon or encortelone or encortolon or equisolon or fernisolone-p or glistelone or hefasolon or hostacortin h or hostacortin h vet or hydeltra or hydeltrone or hydrelta or hydrocortancyl or hydrocortidelt or hydrodeltalone or hydrodeltisone or hydroretrocortin or hydroretrocortine or inflanefran or insolone or keteocort h or key-pred or key-pred sp or lenisolone or leocortol or liquipred or lygal kopftinktur n or mediasolone or meprisolon or meprisolone or metacortalon or metacortalone or metacortandralon or metacortandralone or metacortelone or meti derm or meti-derm or meticortelone or metiderm or morlone or mydrapred or neo delta or nisolon or nisolone or nsc 9120 or nsc9120 or opredsone or panafcortelone or panafcortolone or panafort or paracortol or phlogex or pre cortisyl or preconin or precortalon or precortancyl or precortisyl or pred-ject-50 or predacort 50 or predaject-50 or predalone 50 or predartrina or predartrine or predate or predeltilone or predisole or predisyr or predne dome or prednecort or prednedome or prednelan or predni coelin or predni h tablinen or predni-helvacort or prednicoelin or prednicort or prednicortelone or prednifor drops or predniment or predniretard or prednis or prednisil or prednisolone? or prednivet or prednorsolon or prednorsolone or predonine or predorgasolona or predorgasolone dione or prelon or prelone or prenilone or prenin or prenolone or preventan or prezolon or rubycort or scherisolon or scherisolona or serilone or solondo or solone or solupren or soluprene or spiricort or spolotane or sterane or sterolone or supercortisol or supercortizol or taracortelone or walesolone or wysolone).ti,ab,kw,rn. [Prednisolone Terms] | 186147 |
| 24 | fluprednisolone/ or methylprednisolone/ or methylprednisolone acetate/ or prednimustine/ or methylprednisolone sodium succinate/ or (fluprednisolon$ or methylprednisolon$ or prednimustin$ or Alphadrol or b 673 or b673 or lukrutor or nsc 47439 or nsc47439).ti,ab,kw,rn. [Prednisolone narrower Terms] | 138086 |
| 25 | Doxycycline/ or (Doxycyclin$ or BMY-28689 or BMY 28689 or BMY28689 or BU-3839T or BU 3839T or BU3839T or Doryx or Alpha-6-Deoxyoxytetracycline or Alpha 6 Deoxyoxytetracyclin? or Hydramycin? or Periostat or Vibra-Tabs or Vibra Tabs or Vibramycin? or adoxa or alpha 6 desoxy 5 oxytetracycline or amermycin or atrax or Atridox or azudoxat or bactidox or banndoclin or basedillin or bassado or biocolyn or biodoxi or bronmycin or calcium doxycycline or cloran or cyclidox or dentistar or deoxycycline or deoxymycin dispersal or deoxymykoin or deoxyoxytetracycline or desoxy oxytetracycline or desoxycycline or doinmycin or dosil or dotur or doxaciclin or doxacycline or doxat or doxatet or doxi-sergo or doxibiotic or doxicycline or doxilin or doximed or doximycin or doxin or doxine or doxocycline or doxsig or doxy or doxy 100 or doxy II or doxy m or doxy n tablinen or doxy p ratiopharm or doxy puren or doxy s or doxy tablinen or doxy-1 or doxy-caps or doxybiocin or doxycen or doxycen retard or doxychel or doxycin or doxycyclin or doxycycline calcium or doxycycline hydrate or doxycycline hydrochloride or doxycycline monohydrate or doxycycline ratiopharm or doxycydine monohydrate or doxylag or doxylin or doxymycin or doxypuren or doxytec or doxytrim or dumoxin or duracycline or esdoxin or etidoxina or gewacyclin or gs 3065 or ibralene or idocyclin or idocyklin or interdoxin or investin or longamycin or lydox or magdrin or medomycin or mespafin or mildox or miraclin or monodox or nordox or nsc 56228 or oracea or paldomycin or pernox gel or radox or remycin or respidox or roximycin or serodoxy or servidoxine or servidoxyne or siadocin or siclidon or sigadoxin or spanor or supracyclin or supramycina or tenutan or tolexine or tolexine ge or torymycin or tsurupioxin or unidox or veemycin or viadoxin or vibra s or vibrabiotic or vibracina or vibradox or vibramicin? or vibraveineuse or vibravenos or vibravenos sf or vibravet or viradoxyl-n or wanmycin or zadorin or zenavod).ti,ab,kw,rn. [Doxycycline Terms] | 76404 |
| 26 | daratumumab/ or (daratumumab$ or darzalex* or JNJ 54767414 or 945721-28-8 or 4Z63YK6E0E or ((CD38 or CD-38) adj2 (monoclonal antibod* or mab or moab or humax))).ti,ab,kw,rn. [Daratumumab Terms] | 4163 |
| 27 | Cyclophosphamide/ or (CyBorD or Cy-Bor-D or cyclophosphamid$ or alkyroxan$ or carloxan$ or ciclofosfamida$ or ciclolen$ or ciclophosphamid$ or cicloxal$ or clafen$ or claphen$ or cyclo-cell$ or cycloblastin$ or cyclofos amid$ or cyclofosfamid$ or cyclofosfamid$ or cyclophar$ or cyclophosphan$ or cyclophosphoramid$ or cyclostin$ or cycloxan$ or cyklofosfamid$ or cyphos$ or cytophosphan$ or cytoxan$ or endocyclo phosphat$ or endoxan$ or endoxanal$ or endoxon-asta$ or enduxan$ or genoxal$ or ledoxan$ or ledoxina$ or mitoxan$ or neosan$ or neosar$ or noristan$ or procytox$ or semdoxan$ or sendoxan$ or syklofosfamid$ or zyklophosphamid$ or ASTA B518 or b 518 or b518 or "BRN 0011744" or CB 4564 or CCRIS 188 or CCRIS 7469 50-18-0 or EINECS 200-015-4 or HSDB 3047 or NCI-C04900 or nsc 26271 or nsc 2671 or NSC-26271 or 60007-95-6 or 6055-19-2$or 75526-90-8 or AI3-26198 or 6UXW23996M or 8N3DW7272P or SK 2050).ti,ab,kw,rn. [Cyclophosphamide Terms] | 322551 |
| 28 | Bortezomib/ or (bortezomib$ or HSDB 7666 or ldp 341 or ldp341 or mg 341 or mg341 or mln 341 or mln341 or NSC 681239 or PS 341 or ps341 or Velcad$ or 179324-69-7 or 197730-97-5 or 69G8BD63PP).ti,ab,kw,rn. [Bortezomib Terms] | 42654 |
| 29 | Dexamethasone/ or (dexamethasone$ or adrecort or adrenocot or aeroseb dex or aeroseb-d or aeroseb-dex or aflucoson or aflucoson or AI3-50934 or alfalyl or anaflogistico or aphtasolon or arcodexan or arcodexan or artroson or auxiron or azium or bidexol or bisu ds or calonat or CCRIS 7067 or cebedex or cetadexon or colofoam or corsona or corson or cortastat or cortidex or cortidexason or cortidrona or cortidron or cortisumman or dacortina fuert or dacortine fuert or dalalon or danason or de-sone la or decacortin or decadeltosona or decadeltoson or decaderm or decadion or decadran or decadron or decadronal or decadron or decaesadril or decagel or decaject or decalix or decameth or decamethason or decason or decaspray or decasterolon or decdan or decilon or decofluor or dectancyl or dekacort or delladec or deltafluoren or deltafluoren or dergramin or deronil or desacort or desacorton or desadren or desalark or desametason or desamethason or desameton or desameton or deseronil or desigdron or dex-id or dexa cortidelt or dexa cortisyl or dexa dabrosan or dexa korti or dexa mamallet or dexa scherosan or dexa scherozon or dexa scherozon or dexa-p or dexa-sin or dexac or dexachel or dexacidin or dexacort or dexacortal or dexacorten or dexacortin or dexacortisyl or dexadabroson or dexadecadrol or dexadelton or dexadrol or dexafarma or dexagel or dexagen or dexahelvacort or dexakorti or dexalien or dexalocal or dexalona or dexam or dexamecortin or dexameson or dexameson or dexametason or dexametasona or dexametason or dexameth or dexamethason or dexamethasonum or dexamethazon or dexamethazon or dexamethonium or dexamonozon or dexan or dexan or dexano or dexapolcort or dexapos or dexapot or dexaprol or dexascheroson or dexascherozon or dexascherozon or dexason or dexason or dexinolon or dexinoral or dexionil or dexmethson or dexona or dexon or dexpak or dextelan or dextenza or dextrason or dexycu or dezon or dibasona or dinormon or doxamethason or DXMS or EINECS 200-003-9 or esacorten or exadion or exadion or firmalon or fluormethyl prednisolon or fluormethylprednisolon or fluormon or fluorocort or fluorodelta or fluoromethylprednisolon or fortecortin or gammacorten or gammacorten or grosodexon or grosodexon or hexadecadiol or hexadecadrol or hexadiol or hexadrol or HL-Dex or HSDB 3053 or isnacort or isopto dex or isopto maxidex or isoptodex or isoptomaxidex or lokalison f or loverin or luxazon or marvidion or maxidex or maxitrol or mediamethason or megacortin or mephameson or metasolon or methazon* ion or methazonion or methazonion or methylfluorprednisolon or metisone lafi or mexason or mexidex or millicorten or millicortenol or mk 125 or mk125 or mymethason or neoforderx or neofordex or nisomethasona or novocort or nsc 34521 or nsc34521 or ocu-trol or oftan-dexa or opticorten or opticortinol or oradexan or oradexon or oradexon or orgadron or osurdex or OTO-104 or ozurdex or pidexon or policort or posurdex or predni-f or prednisolon* f or prodexon or sanamethason or santenson or sawason or solurex or spoloven or sterason or sunia sol d or superprednol or thilodexin or tobradex or triamcimetil or turbinair or vexamet or visumetazon or visumethazon or 1950-02-02 or 1050677-47-8 or 137098-19-2 or 7S5I7G3JQL or 8054-59-9 or 906362-70-7 or 906422-84-2).ti,ab,kw,rn. [Dexamethasone Terms] | 245256 |
| 30 | exp *stem cell transplantation/ or stem cell transplantation/ or (stem cell? adj2 (therap$ or transplant$)).ti,ab,kw,rn. [Stem Cell Transplantation Terms] | 259522 |
| 31 | Melphalan/ or (melphalan$ or alanine nitrogen mustard$ or alkeran$ or alkerana$ or AT-290 or BRN 2816456 or CB 3025 or cb3025 or CCRIS 374 or chloroethylaminophenylalanin$ or EINECS 205-726-3 or evomela$ or HSDB 3234 or l pam or phenylalanine mustard$ or sarcolysin$ or l-sarcolysin$ or l-sarkolysin$ or levo phenylalanine mustard$ or levo sarcolysin$ or levofalan$ or levofolan$ or levopholan$ or medphalan$ or melfalan$ or melfalano$ or melphalanum$ or melphalon$ or melphelan$ or merphalan$ or NCI-C04853 or NSC 241286 or NSC 8806 or nsc8806 or phenylalanine 2037 or phenylalanine$ mustard$ or phenylalanine$ nitrogen mustard$ or RCRA waste number U150 or sarcolysin$ or sarkolysin$ or SK 15673 or 148-82-3$ or 8057-25-8 or Q41OR9510P).ti,ab,kw,rn. [Mephalan Terms] | 52340 |
| 32 | (MDex or M-Dex or BMDEx or B-M-Dex).ti,ab,kw,rn. [Combinations: melphalan and dexamethasone (MDex); MDex and bortezomib (BMDex) Terms] | 443 |
| 33 | Bendamustine/ or (bendamustin* or bendeka* or cimet 3393 or cytostasan$ or cytostasan$ or HSDB 7763 or IMET 3393 or levact$ or ribomustin$ or ribovact$ or SDX 105 or treanda or zimet 3393 or zimet3393 or 16506-27-7 or 3543-75-7 or 9266D9P3PQ or 981Y8SX18M).ti,ab,kw,rn. [Bendamustine Terms] | 8820 |
| 34 | Lenalidomide/ or (lenalidomid$ or cc-5013 or cc5013 or cdc 501 or cdc 5013 or cdc501 or cdc5013 or "enmd 0997" or enmd0997 or f0p408n6v4 or hsdb 8220 or imid 3 or imid3 or revimid$ or revlimid$ or 191732-72-6 or 346670-73-3 or 443912-14-9 or F0P408N6V4).ti,ab,kw,rn. [Lenalidomide Terms] | 25919 |
| 35 | Thalidomide/ or (thalidomid$ or actimid$ or ai3-50606 or algosediv$ or asidon 3 or asmadion$ or asmaval$ or bonbrain$ or "brn 0030233" or calmor$ or calmorex$ or ccris 8148 or contergan$ or corronarobetin$ or distaval$ or e-217 or ectiluran$ or einecs 200-031-1 or "enmd 0995" or enterosediv$ or gastrinid$ or glupan$ or glutanon$ or grippex$ or hippuzon$ or hsdb 3586 or imida-lab$ or imidan$ or imiden$ or isomin$ or k 17 or kedavon$ or kevadon$ or neaufatin$ or neosedyn$ or neosydyn$ or nerosedyn$ or neufatin$ or neurodyn$ or neurosedin$ or neurosedym$ or neurosedyn$ or nevrodyn$ or nibrol$ or noctosediv$ or noxodyn$ or nsc 527179 or nsc 66847 or pangul$ or pantosediv$ or poly-giron$ or polygripan$ or predni-sediv$ or pro-bam m$ or pro-ban m$ or profarmil$ or psycholiquid$ or psychotablets$ or quetimid$ or quietoplex$ or sandormin$ or sedalis$ or sedalis sedi-lab$ or sedimid$ or sedin$ or sedisperil$ or sedoval$ or shin naito$ or shinnibrol$ or sleepan$ or slipro$ or softenil$ or softenon$ or synovir$ or talargan$ or talidomida$ or talidomid$ or talimol$ or talismol$ or talizer$ or telagan$ or telargan$ or telargean$ or tensival$ or thado$ or thalimodid$ or thalin$ or thalinett$ or thalix$ or thalomid$ or thalomid$ or theophilcholin$ or ulcerfen$ or valgis$ or valgrain$ or yodomin$ or 14088-68-7 or 4Z8R6ORS6L or 50-35-1 or 731-40-8 or 4Z8R6ORS6L).ti,ab,kw,rn. [Thalidomide Terms] | 44275 |
| 36 | pomalidomide/ or pomalidomid$.ti,ab,kw,rn. | 4520 |
| 37 | carfilzomib/ or (carfilzomib? or Kyprolis or pr 171 or pr171).ti,ab,kw,rn. | 5900 |
| 38 | or/22-37 [All Drug Terms - Embase] | 1142686 |
| 39 | 21 and 38 | 9277 |
| **40** | **39 use oemezd [Amyloidosis Terms AND All Drug Terms - Embase]** | **6967** |
| **41** | **20 or 40 [Medline, Embase - All results]** | **9318** |

**Table S6.** Search strategy for clinical evidence review: Cochrane Library (Ovid).

Database(s): EBM Reviews - ACP Journal Club 1991 to January 2021, EBM Reviews - Cochrane Central Register of Controlled Trials December 2020, EBM Reviews - Cochrane Database of Systematic Reviews 2005 to January 28, 2021, EBM Reviews - Database of Abstracts of Reviews of Effects 1st Quarter 2016, EBM Reviews - Health Technology Assessment 4th Quarter 2016

| **#** | **Searches** | **Results** |
| --- | --- | --- |
| 1 | exp amyloidosis/ or Plaque, Amyloid/ | 192 |
| 2 | (amyloid$ or beta-amyloid$ or paraamyloid$ or beta fibrillosi$ or (amyloid$ adj3 (AL or light-chain or Primary or Systemic or senile or abeta or fibril? or tumo?r or deposit? or plaque?)) or (amyloid adj2 (neuropathy or neuropathies)) or cerebral amyloid? angiopath$ or (abeta adj4 amyloid*) or Famil$ Mediterranean fever? or (muckle wells adj2 (syndrome$ or disease?)) or (neuritic plaque? or senile plaque?)).tw. | 2942 |
| 3 | or/1-2 [Amyloidosis] | 2973 |
| 4 | (ixazomib or (min 2238 or min2238)).tw. | 276 |
| 5 | Prednisolone/ | 2999 |
| 6 | (adelcort or wysolone).tw. | 1 |
| 7 | (nsc 9120 or nsc9120).tw. | 1 |
| 8 | methylprednisolone/ or methylprednisolone acetate/ or methylprednisolone hemisuccinate/ or prednimustine/ | 2739 |
| 9 | fluprednisolone/ | 35 |
| 10 | (fluprednisolon$ or methylprednisolon$ or prednimustin$ or Alphadrol or lukrutor).tw. | 4159 |
| 11 | Doxycycline/ | 1065 |
| 12 | (Doxycyclin$ or zenavod).tw. | 2176 |
| 13 | daratumumab/ | 48 |
| 14 | (daratumumab$ or darzalex* or JNJ 54767414 or 945721-28-8 or 4Z63YK6E0E or ((CD38 or CD-38) adj2 (monoclonal antibod* or mab or moab or humax))).tw. | 365 |
| 15 | Cyclophosphamide/ | 5100 |
| 16 | (CyBorD or Cy-Bor-D).tw. | 21 |
| 17 | (cyclophosphamid$ or alkyroxan$ or carloxan$ or ciclofosfamida$ or ciclolen$ or ciclophosphamid$ or cicloxal$ or clafen$ or claphen$ or cyclo-cell$ or cycloblastin$ or cyclofos amid$ or cyclofosfamid$ or cyclofosfamid$ or cyclophar$ or cyclophosphan$ or cyclophosphoramid$ or cyclostin$ or cycloxan$ or cyklofosfamid$ or cyphos$ or cytophosphan$ or cytoxan$ or endocyclo phosphat$ or endoxan$ or endoxanal$ or endoxon-asta$ or enduxan$ or genoxal$ or ledoxan$ or ledoxina$ or mitoxan$ or neosan$ or neosar$ or noristan$ or procytox$ or semdoxan$ or sendoxan$ or syklofosfamid$ or zyklophosphamid$).tw. | 12017 |
| 18 | (ASTA B518 or b 518 or b518 or "BRN 0011744" or CB 4564 or CCRIS 188 or CCRIS 7469 50-18-0 or EINECS 200-015-4 or HSDB 3047 or NCI-C04900 or nsc 26271 or nsc 2671 or NSC-26271 or 60007-95-6 or 6055-19-2$or 75526-90-8 or AI3-26198 or 6UXW23996M or 8N3DW7272P or SK 20501 or RCRA waste number U058).tw. | 33 |
| 19 | Bortezomib/ | 455 |
| 20 | (bortezomib$ or HSDB 7666 or ldp 341 or ldp341 or mg 341 or mg341 or mln 341 or mln341 or NSC 681239 or PS 341 or ps341 or Velcad$ or 179324-69-7 or 197730-97-5 or 69G8BD63PP).tw. | 2164 |
| 21 | (bortezomib$ or Velcad$).tw. | 2153 |
| 22 | (ASTA B518 or b 518 or b518 or "BRN 0011744" or CB 4564 or CCRIS 188 or CCRIS 7469 50-18-0 or EINECS 200-015-4 or HSDB 3047 or NCI-C04900 or nsc 26271 or nsc 2671 or NSC-26271 or 60007-95-6 or 6055-19-2$or 75526-90-8 or AI3-26198 or 6UXW23996M or 8N3DW7272P or SK 20501 or RCRA waste number U058).tw. | 33 |
| 23 | Dexamethasone/ | 4543 |
| 24 | (dexamethasone$ or adrecort or adrenocot or aeroseb dex or aeroseb-d or aeroseb-dex or aflucoson or aflucoson or AI3-50934 or alfalyl or anaflogistico or aphtasolon or arcodexan or arcodexan or artroson or auxiron or azium or bidexol or bisu ds or calonat or CCRIS 7067 or cebedex or cetadexon or colofoam or corsona or corson or cortastat or cortidex or cortidexason or cortidrona or cortidron or cortisumman or dacortina fuert or dacortine fuert or dalalon or danason or de-sone la or decacortin or decadeltosona or decadeltoson or decaderm or decadion or decadran or decadron or decadronal or decadron or decaesadril or decagel or decaject or decalix or decameth or decamethason or decason or decaspray or decasterolon or decdan or decilon or decofluor or dectancyl or dekacort or delladec or deltafluoren or deltafluoren or dergramin or deronil or desacort or desacorton or (desadren or desalark or desametason or desamethason or desameton or desam eton or deseronil or desigdron or dex-id or dexa cortidelt or dexa cortisyl or dexa dabrosan or dexa korti or dexa mamallet or dexa scherosan or dexa scherozon or dexa scherozon or dexa-p or dexa-sin or dexac or dexachel or dexacidin or dexacort or dexacortal or dexacorten or dexacortin or dexacortisyl or dexadabroson or dexadecadrol or dexadelton or dexadrol or dexafarma or dexagel or dexagen or dexahelvacort or dexakorti or dexalien or dexalocal or dexalona or dexam or dexamecortin or dexameson or dexameson or dexametason or dexametasona or dexametason or dexameth or dexamethason or dexamethasonum or dexamethazon or dexamethazon or dexamethonium or dexamonozon or dexan or dexan or dexano or dexapolcort or dexapos or dexapot or dexaprol)).tw. | 11643 |
| 25 | (dexascheroson or dexascherozon or dexascherozon or dexason or dexason or dexinolon or dexinoral or dexionil or dexmethson or dexona or dexon or dexpak or dextelan or dextenza or dextrason or dexycu or dezon or dibasona or dinormon or doxamethason or DXMS or EINECS 200-003-9 or esacorten or exadion or exadion or firmalon or fluormethyl prednisolon or fluormethylprednisolon or fluormon or fluorocort or fluorodelta or fluoromethylprednisolon or fortecortin or gammacorten or gammacorten or grosodexon or grosodexon or hexadecadiol or hexadecadrol or hexadiol or hexadrol or HL-Dex or HSDB 3053 or isnacort or isopto dex or isopto maxidex or isoptodex).tw. | 172 |
| 26 | (isoptomaxidex or lokalison f or loverin or luxazon or marvidion or maxidex or maxitrol or mediamethason or megacortin or mephameson or metasolon or methazon* ion or methazonion or methazonion or methylfluorprednisolon or metisone lafi or mexason or mexidex or millicorten or millicortenol or mk 125 or mk125 or mymethason or neoforderx or neofordex or nisomethasona or novocort or nsc 34521 or nsc34521 or ocu-trol or oftan-dexa or opticorten or opticortinol or oradexan or oradexon or oradexon or orgadron or osurdex or OTO-104 or ozurdex or pidexon or policort or posurdex or predni-f or prednisolon* f or prodexon or sanamethason or santenson or sawason or solurex or spoloven or sterason or sunia sol d or superprednol or thilodexin or tobradex or triamcimetil or turbinair or vexamet or visumetazon or visumethazon).tw. | 264 |
| 27 | (1950-02-02 or 1050677-47-8 or 137098-19-2 or 7S5I7G3JQL or 8054-59-9 or 906362-70-7 or 906422-84-2).tw. | 0 |
| 28 | stem cell transplantation/ or cord blood stem cell transplantation/ or hematopoietic stem cell transplantation/ or peripheral blood stem cell transplantation/ or mesenchymal stem cell transplantation/ | 2096 |
| 29 | (stem cell? adj2 (therap$ or transplant$)).tw. | 8189 |
| 30 | Melphalan/ | 687 |
| 31 | (melphalan$ or alanine nitrogen mustard$ or alkeran$ or alkerana$ or AT-290 or BRN 2816456 or CB 3025 or cb3025 or CCRIS 374 or chloroethylaminophenylalanin$ or EINECS 205-726-3 or evomela$ or HSDB 3234 or l pam or phenylalanine mustard$ or sarcolysin$ or l-sarcolysin$ or l-sarkolysin$ or levo phenylalanine mustard$ or levo sarcolysin$ or levofalan$ or levofolan$ or levopholan$ or medphalan$ or melfalan$ or melfalano$ or melphalanum$ or melphalon$ or melphelan$ or merphalan$ or NCI-C04853 or NSC 241286 or NSC 8806 or nsc8806 or phenylalanine 2037 or phenylalanine$ mustard$ or phenylalanine$ nitrogen mustard$ or RCRA waste number U150 or sarcolysin$ or sarkolysin$ or SK 15673 or 148-82-3$ or 8057-25-8 or Q41OR9510P).tw. | 6234 |
| 32 | Bendamustine Hydrochloride/ | 127 |
| 33 | (bendamustin* or bendeka* or cimet 3393 or cytostasan$ or cytostasan$ or HSDB 7763 or IMET 3393 or levact$ or ribomustin$ or ribovact$ or SDX 105 or treanda or zimet 3393 or zimet3393 or 16506-27-7 or 3543-75-7 or 9266D9P3PQ or 981Y8SX18M).tw. | 748 |
| 34 | Lenalidomide/ | 396 |
| 35 | (lenalidomid$ or cc-5013 or cc5013 or cdc 501 or cdc 5013 or cdc501 or cdc5013 or "enmd 0997" or enmd0997 or f0p408n6v4 or hsdb 8220 or imid 3 or imid3 or revimid$ or revlimid$ or 191732-72-6 or 346670-73-3 or 443912-14-9 or F0P408N6V4).tw. | 2165 |
| 36 | Thalidomide/ | 893 |
| 37 | (thalidomid$ or actimid$ or ai3-50606 or algosediv$ or asidon 3 or asmadion$ or asmaval$ or bonbrain$ or "brn 0030233" or calmor$ or calmorex$ or ccris 8148 or contergan$ or corronarobetin$ or distaval$ or e-217 or ectiluran$ or einecs 200-031-1 or "enmd 0995" or enterosediv$ or gastrinid$ or glupan$ or glutanon$ or grippex$ or hippuzon$ or hsdb 3586 or imida-lab$ or imidan$ or imiden$ or isomin$ or k 17 or kedavon$ or kevadon$ or neaufatin$ or neosedyn$ or neosydyn$ or nerosedyn$ or neufatin$ or neurodyn$ or neurosedin$ or neurosedym$ or neurosedyn$ or nevrodyn$ or nibrol$ or noctosediv$ or noxodyn$ or nsc 527179 or nsc 66847 or pangul$ or pantosediv$ or poly-giron$ or polygripan$ or predni-sediv$ or pro-bam m$ or pro-ban m$ or profarmil$ or psycholiquid$ or psychotablets$ or quetimid$ or quietoplex$ or sandormin$ or sedalis$ or sedalis sedi-lab$ or sedimid$ or sedin$ or sedisperil$ or sedoval$ or shin naito$ or shinnibrol$ or sleepan$ or slipro$ or softenil$ or softenon$ or synovir$ or talargan$ or talidomida$ or talidomid$ or talimol$ or talismol$ or talizer$ or telagan$ or telargan$ or telargean$ or tensival$ or thado$ or thalimodid$ or thalin$ or thalinett$ or thalix$ or thalomid$ or thalomid$ or theophilcholin$ or ulcerfen$ or valgis$ or valgrain$ or yodomin$ or 14088-68-7 or 4Z8R6ORS6L or 50-35-1 or 731-40-8 or 4Z8R6ORS6L).tw. | 1840 |
| 38 | (MDex or M-Dex or BMDEx or B-M-Dex).tw. | 16 |
| 39 | pomalidomide/ | 49 |
| 40 | POMALIDOMID$.tw. | 349 |
| 41 | carfilzomib/ | 0 |
| 42 | (carfilzomib? or Kyprolis or pr 171 or pr171).tw. | 406 |
| 43 | or/4-42 [ Drug interventions or comparators] | 48154 |
| 44 | 3 and 43 | 169 |
| 45 | 44 use cctr [Cochrane Central results] | 154 |
| 46 | 3 use coch [Cochrane systematic reviews] | 123 |
| 47 | 3 use dare [DARE results] | 18 |
| 48 | 3 use acp [ACP Journal Club results] | 12 |
| **49** | **45 or 46 or 47 or 48 [All results]** | **307** |

**Table S7.** Search strategy for the health-related quality of life evidence review.

Database(s): Embase 1974 to 2021 April 13, Ovid MEDLINE(R) and Epub Ahead of Print, In-Process, In-Data-Review & Other Non-Indexed Citations and Daily 1946 to April 13, 2021

| **#** | **Searches** | **Results** |
| --- | --- | --- |
| 1 | "Value of Life"/ | 142972 |
| 2 | Quality of Life/ | 710619 |
| 3 | quality of life.ti,kf. | 205472 |
| 4 | ((instrument or instruments) adj3 quality of life).ab. | 8454 |
| 5 | Quality-Adjusted Life Years/ | 41828 |
| 6 | quality adjusted life.ti,ab,kf. | 35589 |
| 7 | (qaly* or qald* or qale* or qtime* or life year or life years).ti,ab,kf. | 58434 |
| 8 | disability adjusted life.ti,ab,kf. | 8429 |
| 9 | daly*.ti,ab,kf. | 7923 |
| 10 | (sf36 or sf 36 or short form 36 or shortform 36 or short form36 or shortform36 or sf thirtysix or sfthirtysix or sfthirty six or sf thirty six or shortform thirtysix or shortform thirty six or short form thirtysix or short form thirty six).ti,ab,kf. | 71088 |
| 11 | (sf6 or sf 6 or short form 6 or shortform 6 or sf six or sfsix or shortform six or short form six or shortform6 or short form6).ti,ab,kf. | 4827 |
| 12 | (sf8 or sf 8 or sf eight or sfeight or shortform 8 or shortform 8 or shortform8 or short form8 or shortform eight or short form eight).ti,ab,kf. | 1417 |
| 13 | (sf12 or sf 12 or short form 12 or shortform 12 or short form12 or shortform12 or sf twelve or sftwelve or shortform twelve or short form twelve).ti,ab,kf. | 16538 |
| 14 | (sf16 or sf 16 or short form 16 or shortform 16 or short form16 or shortform16 or sf sixteen or sfsixteen or shortform sixteen or short form sixteen).ti,ab,kf. | 99 |
| 15 | (sf20 or sf 20 or short form 20 or shortform 20 or short form20 or shortform20 or sf twenty or sftwenty or shortform twenty or short form twenty).ti,ab,kf. | 892 |
| 16 | (hql or hqol or h qol or hrqol or hr qol).ti,ab,kf. | 50150 |
| 17 | (hye or hyes).ti,ab,kf. | 216 |
| 18 | (health* adj2 year* adj2 equivalent*).ti,ab,kf. | 100 |
| 19 | (pqol or qls).ti,ab,kf. | 1066 |
| 20 | (quality of wellbeing or quality of well being or index of wellbeing or index of well being or qwb).ti,ab,kf. | 1379 |
| 21 | nottingham health profile*.ti,ab,kf. | 2761 |
| 22 | sickness impact profile.ti,ab,kf. | 2315 |
| 23 | exp health status indicators/ | 350665 |
| 24 | (health adj3 (utilit* or status)).ti,ab,kf. | 176634 |
| 25 | (utilit* adj3 (valu* or measur* or health or life or estimat* or elicit* or disease or score* or weight)).ti,ab,kf. | 34200 |
| 26 | (preference* adj3 (valu* or measur* or health or life or estimat* or elicit* or disease or score* or instrument or instruments)).ti,ab,kf. | 27177 |
| 27 | disutilit*.ti,ab,kf. | 1496 |
| 28 | rosser.ti,ab,kf. | 230 |
| 29 | willingness to pay.ti,ab,kf. | 16133 |
| 30 | standard gamble*.ti,ab,kf. | 2012 |
| 31 | (time trade off or time tradeoff).ti,ab,kf. | 3550 |
| 32 | tto.ti,ab,kf. | 2951 |
| 33 | (hui or hui1 or hui2 or hui3).ti,ab,kf. | 4149 |
| 34 | (eq or euroqol or euro qol or eq5d or eq 5d or euroqual or euro qual).ti,ab,kf. | 47380 |
| 35 | duke health profile.ti,ab,kf. | 203 |
| 36 | functional status questionnaire.ti,ab,kf. | 286 |
| 37 | dartmouth coop functional health assessment*.ti,ab,kf. | 26 |
| 38 | (WHOQOL or WHOQOL-BREF).ti,ab,kf. | 7911 |
| 39 | (chronic respiratory questionnaire or chronic respiratory disease questionnaire or CRQ).ti,ab,kf. | 1670 |
| 40 | (St* George* Hospital questionnaire or SGRQ).ti,ab,kf. | 5441 |
| 41 | DIsability RElated to COPD Tool.ti,ab,kf. | 7 |
| 42 | london handicap scale.ti,ab,kf. | 204 |
| 43 | ((modified medical research council dyspn?ea or MMRC) adj scale).ti,ab,kf. | 1006 |
| 44 | "MRC-D".ti,ab,kf. | 3 |
| 45 | (airways questionnaire or AQ20).ti,ab,kf. | 109 |
| 46 | (breathing problems questionnaire or BPQ or "BPQ-S").ti,ab,kf. | 274 |
| 47 | COPD activity rating scale.ti,ab,kf. | 4 |
| 48 | COPD assessment test.ti,ab,kf. | 2990 |
| 49 | (clinical COPD questionnaire or CCQ).tw,kf. | 911 |
| 50 | (("10" or ten) adj item respiratory illness questionnaire).ti,ab,kf. | 3 |
| 51 | "RIQ-MON10".ti,ab,kf. | 2 |
| 52 | "cost of illness"/ | 48282 |
| 53 | (cost? adj3 illness*).ti,ab,kf. | 7339 |
| 54 | exp Disability Evaluation/ | 221376 |
| 55 | ((disabil* or disabled or impaired or impairment*) adj3 (estimat* or evaluat* or instrument or instruments or measur* or scale? or score? or weight? or valu*)).ti,ab,kf. | 107094 |
| 56 | burden*.ti,ab,kf. | 617313 |
| 57 | (toll or tolls).ti,ab,kf. | 109488 |
| 58 | exp Severity of Illness Index/ | 280048 |
| 59 | ((disease* or illness* or sickness*) adj3 sever* adj2 (estimat* or evaluat* or instrument or instruments or measur* or scale? or score? or weight? or valu*)).ti,ab,kf. | 21259 |
| 60 | ((disease* or illness* or sickness*) adj2 impact?).ti,ab,kf. | 25149 |
| 61 | Absenteeism/ | 27232 |
| 62 | absentee*.ti,ab,kf. | 15693 |
| 63 | Presenteeism/ | 1923 |
| 64 | presentee*.ti,ab,kf. | 4169 |
| 65 | productivit*.ti,ab,kf. | 142707 |
| 66 | ((work* or employ*) adj5 (absenc* or absent* or presenc* or present*)).ti,ab,kf. | 297795 |
| 67 | ((work* or employ*) adj5 abilit*).ti,ab,kf. | 29630 |
| 68 | (time adj1 away).ti,ab,kf. | 1756 |
| 69 | Sick Leave/ | 12120 |
| 70 | ((sick or medical) adj leave).ti,ab,kf. | 12663 |
| 71 | or/1-70 [QoL/DISEASE BURDEN] | 2838439 |
| 72 | exp amyloidosis/ | 74274 |
| 73 | amyloidos$.ti,ab,kw,kf. | 58501 |
| 74 | or/72-73 [Amyloidosis] | 85790 |
| 75 | 71 and 74 | 4335 |
| 76 | exp animals/ not humans.sh. | 32006278 |
| 77 | 75 not 76 | 1303 |
| **78** | **77 use ppez** | **1134** |
| 79 | socioeconomics/ | 143736 |
| 80 | exp quality of life/ | 734708 |
| 81 | quality of life.ti,kw. | 240406 |
| 82 | ((instrument or instruments) adj3 quality of life).ab. | 8454 |
| 83 | quality-adjusted life year/ | 41828 |
| 84 | quality adjusted life.ti,ab,kw. | 35744 |
| 85 | (qaly* or qald* or qale* or qtime* or life year or life years).ti,ab,kw. | 58802 |
| 86 | disability-adjusted life year/ | 2489 |
| 87 | disability adjusted life.ti,ab,kw. | 8445 |
| 88 | daly*.ti,ab,kw. | 8042 |
| 89 | (sf36 or sf 36 or short form 36 or shortform 36 or short form36 or shortform36 or sf thirtysix or sfthirtysix or sfthirty six or sf thirty six or shortform thirtysix or shortform thirty six or short form thirtysix or short form thirty six).ti,ab,kw. | 71377 |
| 90 | (sf6 or sf 6 or short form 6 or shortform 6 or sf six or sfsix or shortform six or short form six or shortform6 or short form6).ti,ab,kw. | 4840 |
| 91 | (sf8 or sf 8 or sf eight or sfeight or shortform 8 or shortform 8 or shortform8 or short form8 or shortform eight or short form eight).ti,ab,kw. | 1421 |
| 92 | (sf12 or sf 12 or short form 12 or shortform 12 or short form12 or shortform12 or sf twelve or sftwelve or shortform twelve or short form twelve).ti,ab,kw. | 16605 |
| 93 | (sf16 or sf 16 or short form 16 or shortform 16 or short form16 or shortform16 or sf sixteen or sfsixteen or shortform sixteen or short form sixteen).ti,ab,kw. | 99 |
| 94 | (sf20 or sf 20 or short form 20 or shortform 20 or short form20 or shortform20 or sf twenty or sftwenty or shortform twenty or short form twenty).ti,ab,kw. | 892 |
| 95 | (hql or hqol or h qol or hrqol or hr qol).ti,ab,kw. | 50364 |
| 96 | (hye or hyes).ti,ab,kw. | 220 |
| 97 | (health* adj2 year* adj2 equivalent*).ti,ab,kw. | 103 |
| 98 | (pqol or qls).ti,ab,kw. | 1068 |
| 99 | (quality of wellbeing or quality of well being or index of wellbeing or index of well being or qwb).ti,ab,kw. | 1388 |
| 100 | nottingham health profile*.ti,ab,kw. | 2774 |
| 101 | nottingham health profile/ | 535 |
| 102 | sickness impact profile.ti,ab,kw. | 2355 |
| 103 | sickness impact profile/ | 9593 |
| 104 | health status indicator/ | 26863 |
| 105 | (health adj3 (utilit* or status)).ti,ab,kw. | 178145 |
| 106 | (utilit* adj3 (valu* or measur* or health or life or estimat* or elicit* or disease or score* or weight)).ti,ab,kw. | 34327 |
| 107 | (preference* adj3 (valu* or measur* or health or life or estimat* or elicit* or disease or score* or instrument or instruments)).ti,ab,kw. | 27254 |
| 108 | disutilit*.ti,ab,kw. | 1500 |
| 109 | rosser.ti,ab,kw. | 231 |
| 110 | willingness to pay.ti,ab,kw. | 16301 |
| 111 | standard gamble*.ti,ab,kw. | 2032 |
| 112 | (time trade off or time tradeoff).ti,ab,kw. | 3584 |
| 113 | tto.ti,ab,kw. | 2961 |
| 114 | (hui or hui1 or hui2 or hui3).ti,ab,kw. | 4163 |
| 115 | (eq or euroqol or euro qol or eq5d or eq 5d or euroqual or euro qual).ti,ab,kw. | 47442 |
| 116 | duke health profile.ti,ab,kw. | 203 |
| 117 | functional status questionnaire.ti,ab,kw. | 287 |
| 118 | dartmouth coop functional health assessment*.ti,ab,kw. | 26 |
| 119 | (WHOQOL or WHOQOL-BREF).ti,ab,kw. | 7949 |
| 120 | (chronic respiratory questionnaire or chronic respiratory disease questionnaire or CRQ).ti,ab,kw. | 1673 |
| 121 | "St. George Respiratory Questionnaire"/ | 3539 |
| 122 | (St* George* Hospital questionnaire or SGRQ).ti,ab,kw. | 5457 |
| 123 | DIsability RElated to COPD Tool.ti,ab,kw. | 7 |
| 124 | london handicap scale.ti,ab,kw. | 204 |
| 125 | ((modified medical research council dyspn?ea or MMRC) adj scale).ti,ab,kw. | 1004 |
| 126 | "MRC-D".ti,ab,kw. | 3 |
| 127 | (airways questionnaire or AQ20).ti,ab,kw. | 110 |
| 128 | (breathing problems questionnaire or BPQ or "BPQ-S").ti,ab,kw. | 274 |
| 129 | COPD activity rating scale.ti,ab,kw. | 4 |
| 130 | COPD assessment test.ti,ab,kw. | 2995 |
| 131 | (clinical COPD questionnaire or CCQ).ti,ab,kw. | 912 |
| 132 | (("10" or ten) adj item respiratory illness questionnaire).ti,ab,kw. | 3 |
| 133 | "RIQ-MON10".ti,ab,kw. | 2 |
| 134 | "cost of illness"/ | 48282 |
| 135 | (cost? adj3 illness*).ti,ab,kw. | 8034 |
| 136 | disability/ | 116365 |
| 137 | ((disabil* or disabled or impaired or impairment*) adj3 (estimat* or evaluat* or instrument or instruments or measur* or scale? or score? or weight? or valu*)).ti,ab,kw. | 106801 |
| 138 | disease burden/ | 48673 |
| 139 | burden*.ti,ab,kw. | 618487 |
| 140 | (toll or tolls).ti,ab,kw. | 110614 |
| 141 | "severity of illness index"/ | 270928 |
| 142 | ((disease* or illness* or sickness*) adj3 sever* adj2 (estimat* or evaluat* or instrument or instruments or measur* or scale? or score? or weight? or valu*)).ti,ab,kw. | 21294 |
| 143 | ((disease* or illness* or sickness*) adj2 impact?).ti,ab,kw. | 25219 |
| 144 | absenteeism/ | 27232 |
| 145 | absentee*.ti,ab,kw. | 15987 |
| 146 | presenteeism/ | 1923 |
| 147 | presentee*.ti,ab,kw. | 4269 |
| 148 | productivity/ | 57314 |
| 149 | productivit*.ti,ab,kw. | 143517 |
| 150 | ((work* or employ*) adj5 (absenc* or absent* or presenc* or present*)).ti,ab,kw. | 297925 |
| 151 | ((work* or employ*) adj5 abilit*).ti,ab,kw. | 29710 |
| 152 | (time adj1 away).ti,ab,kw. | 1759 |
| 153 | medical leave/ | 7141 |
| 154 | ((sick or medical) adj leave).ti,ab,kw. | 12866 |
| 155 | or/79-154 [QoL/DISEASE BURDEN] | 2789940 |
| 156 | exp *amyloidosis/ | 52183 |
| 157 | AL amyloidosis/ | 3192 |
| 158 | amyloidos$.ti,ab,kw. | 58406 |
| 159 | or/156-158 [Amyloidosis] | 72487 |
| 160 | (exp animals/ or exp invertebrate/ or animal experiment/ or animal model/ or animal tissue/ or animal cell/ or nonhuman/) and (human/ or normal human/ or human cell/) | 41579186 |
| 161 | exp animals/ or exp invertebrate/ or animal experiment/ or animal model/ or animal tissue/ or animal cell/ or nonhuman/ | 53095322 |
| 162 | 161 not 160 | 11516136 |
| 163 | 155 and 159 | 3398 |
| 164 | 163 not 162 [Remove Animals] | 3107 |
| **165** | **164 use oemezd** | **2086** |
| **166** | **78 or 165 [All results - MEDLINE & Embase]** | **3220** |

**Table S8.** Search strategy for economic evidence review.

Database(s): EBM Reviews - Health Technology Assessment 4th Quarter 2016, EBM Reviews - NHS Economic Evaluation Database 1st Quarter 2016, Embase 1974 to 2021 February 02, Ovid MEDLINE(R) and Epub Ahead of Print, In-Process & Other Non-Indexed Citations and Daily 1946 to February 01, 2021

| **#** | **Searches** | **Results** |
| --- | --- | --- |
| 1 | exp Amyloidosis/ec [Economics] | 8 |
| 2 | Amyloidosis/ or Immunoglobulin Light-chain Amyloidosis/ or (amyloid$ or beta-amyloid$ or paraamyloid$ or beta fibrillosi$ or (amyloid$ adj3 (AL or light-chain or Primary or Systemic or senile or abeta or fibril? or tumo?r or deposit?))).ti,ab,kw,kf. | 243484 |
| 3 | Economics/ | 268686 |
| 4 | exp "Costs and Cost Analysis"/ | 616133 |
| 5 | Economics, Nursing/ | 35468 |
| 6 | Economics, Medical/ | 41496 |
| 7 | Economics, Pharmaceutical/ | 10626 |
| 8 | exp Economics, Hospital/ | 898100 |
| 9 | Economics, Dental/ | 34701 |
| 10 | exp "Fees and Charges"/ | 71566 |
| 11 | exp Budgets/ | 43982 |
| 12 | budget*.ti,ab,kf. | 71441 |
| 13 | (economic* or cost or costs or costly or costing or price or prices or pricing or pharmacoeconomic* or pharmaco-economic* or expenditure or expenditures or expense or expenses or financial or finance or finances or financed).ti,kf. | 510007 |
| 14 | (economic* or cost or costs or costly or costing or price or prices or pricing or pharmacoeconomic* or pharmaco-economic* or expenditure or expenditures or expense or expenses or financial or finance or finances or financed).ab. /freq=2 | 739053 |
| 15 | (cost* adj2 (effective* or utilit* or benefit* or minimi* or analy* or outcome or outcomes)).ab,kf. | 406680 |
| 16 | (value adj2 (money or monetary)).ti,ab,kf. | 5984 |
| 17 | exp models, economic/ | 19542 |
| 18 | economic model*.ab,kf. | 8348 |
| 19 | markov chains/ | 23169 |
| 20 | markov.ti,ab,kf. | 53810 |
| 21 | Monte Carlo Method/ | 71504 |
| 22 | monte carlo.ti,ab,kf. | 102270 |
| 23 | exp Decision Theory/ | 14845 |
| 24 | (decision* adj2 (tree* or analy* or model*)).ti,ab,kf. | 62535 |
| 25 | or/3-24 [CADTH Econ Filter] | 2234142 |
| 26 | exp animals/ not humans.sh. | 31497032 |
| 27 | (and/2,25) not 26 | 732 |
| 28 | or/1,27 | 734 |
| **29** | **28 use ppez [MEDLINE results]** | **548** |
| 30 | amyloidosis/ or AL amyloidosis/ or (amyloid$ or beta-amyloid$ or paraamyloid$ or beta fibrillosi$ or (amyloid$ adj3 (AL or light-chain or Primary or Systemic or senile or abeta or fibril? or tumo?r or deposit?))).ti,ab,kw. [Amyloidosis] | 243335 |
| 31 | *Economics/ or *Cost/ or exp *Health Economics/ or *Budget/ or *Statistical Model/ or *Probability/ or *Decision Theory/ or *Decision Tree/ or *Monte Carlo Method/ | 406660 |
| 32 | (economic* or cost or costs or costly or costing or price or prices or pricing or pharmacoeconomic* or pharmaco-economic* or expenditure or expenditures or expense or expenses or financial or finance or finances or financed).ti,kw. | 533324 |
| 33 | (economic* or cost or costs or costly or costing or price or prices or pricing or pharmacoeconomic* or pharmaco-economic* or expenditure or expenditures or expense or expenses or financial or finance or finances or financed).ab. /freq=2 | 739053 |
| 34 | (cost* adj2 (effective* or utilit* or benefit* or minimi* or analy* or outcome or outcomes)).ab,kw. | 410978 |
| 35 | (value adj2 (money or monetary)).ti,ab,kw. | 5994 |
| 36 | economic model*.ab,kw. | 8617 |
| 37 | markov.ti,ab,kw. | 54472 |
| 38 | monte carlo.ti,ab,kw. | 103439 |
| 39 | (decision* adj2 (tree* or analy* or model*)).ti,ab,kw. | 63393 |
| 40 | or/31-39 [CADTH Economic Filter] | 1549000 |
| 41 | 30 and 40 [Amyloidosis & CADTH Econ Filter] | 1443 |
| 42 | exp animal experimentation/ or exp animal model/ or exp animal experiment/ or nonhuman/ or exp vertebrate/ | 51292214 |
| 43 | exp human/ or exp human experimentation/ or exp human experiment/ | 40974317 |
| 44 | 41 not (42 not 43) [Remove Animal studies] | 1329 |
| **45** | **44 use oemezd [Embase results]** | **856** |
| 46 | (amyloid$ or beta-amyloid$ or paraamyloid$ or beta fibrillosi$ or (amyloid$ adj3 (AL or light-chain or Primary or Systemic or senile or abeta or fibril? or tumo?r or deposit?))).ti,ab. | 230545 |
| **47** | **46 use clhta,cleed [HTA, NHS EED results]** | **7** |
| **48** | **29 or 45 or 47 [All results - MEDLINE, Embase, HTA, NHS EED]** | **1411** |

**Table S9.** Search strategy for resource use and indirect costs evidence review.

Database(s): EBM Reviews - Cochrane Central Register of Controlled Trials December 2020, EBM Reviews - Health Technology Assessment 4th Quarter 2016, EBM Reviews - NHS Economic Evaluation Database 1st Quarter 2016, Embase 1974 to 2021 February 03, Ovid MEDLINE(R) and Epub Ahead of Print, In-Process & Other Non-Indexed Citations and Daily 1946 to February 01, 2021

| **#** | **Searches** | **Results** |
| --- | --- | --- |
| 1 | exp amyloidosis/ | 73452 |
| 2 | amyloido$.ti,ab,hw,kw,kf. or ((amyloid$ or beta-amyloid$) adj2 plaque?).ti,ab,kw,kf. | 104951 |
| 3 | (beta fibrillosi$ or paraamyloidos$).ti,ab,kw. | 15 |
| 4 | ((light chain? or light-chain?) adj2 amyloid$).ti,ab,kw,kf. | 5432 |
| 5 | (amyloid adj2 (neuropathy or neuropathies)).ti,ab,kw,kf. | 735 |
| 6 | cerebral amyloid? angiopath$.ti,ab,kw,kf. | 6854 |
| 7 | (abeta adj4 amyloid*).ti,ab,kw,kf. | 49116 |
| 8 | (amyloid$ adj2 (fibril or fibrils or deposit?)).ti,ab,kw,kf. | 31445 |
| 9 | (Famil$ Mediterranean fever? or (muckle wells adj2 (syndrome$ or disease?))).ti,ab,kw,kf. | 9718 |
| 10 | Plaque, Amyloid/ | 8301 |
| 11 | (neuritic plaque? or senile plaque?).ti,ab,kw,kf. | 14850 |
| 12 | or/1-11 [Amyloidosis] | 177449 |
| 13 | exp Economics/ or ec.fs. or Models, Economic/ or Markov Chains/ or Decision Trees/ or Monte Carlo Method/ | 6636140 |
| 14 | (markov or monte carlo or decision tree?).ti,ab,kw,kf. | 173383 |
| 15 | (blue cross or blue shield or economic? or expenditure? or expense? or expensive or fee or fees or financ$ or insurance or medicare or medicaid? or paid or payment? or payer? or payee? or pays or prepaid or pre-paid or prepay$ or pre-pay$ or reimburs$ or (pay adj2 (care or drug? or healthcare or medication? or medicine? or pharma$ or prescription?))).ti,ab,kw,kf. | 1666615 |
| 16 | (pharmacoeconomic* or pharmaco-economic*).ti,ab,kw,kf. | 15484 |
| 17 | (microeconomic? or macroeconomic? or micro-economic? or macro-economic?).ti,ab,kw,kf. | 8343 |
| 18 | (resource? adj2 allocation?).ti,ab,kw,kf. | 29138 |
| 19 | ((utility adj2 (theory or theories)) or easterlin hypothes?s).ti,ab,kw,kf. | 1064 |
| 20 | (payment? or payer? or payee? or pays).ti,ab,kw,kf. | 119212 |
| 21 | (price? or pricing or price-point? or price-set$).ti,ab,kw,kf. | 105622 |
| 22 | remittance?.ti,ab,kw,kf. | 1223 |
| 23 | expropriation?.ti,ab,kw,kf. | 116 |
| 24 | consumption.ti,ab,kw,kf. | 749846 |
| 25 | capital.ti,ab,kw,kf. | 64683 |
| 26 | bankrupt$.ti,ab,kw,kf. | 1642 |
| 27 | debt?.ti,ab,kw,kf. | 10764 |
| 28 | (tax or taxed or taxes or taxation or taxing).ti,ab,kw,kf. | 37716 |
| 29 | (purchase? or purchasing).ti,ab,kw,kf. | 73667 |
| 30 | savings.ti,ab,kw,kf. | 84925 |
| 31 | (managed care or HMO or hmos or health manag$ organi?ation? or health benefit? plan? or health maintenance organi?ation?).ti,ab,kw,kf. | 62647 |
| 32 | (affordable or affordability).ti,ab,kw,kf. | 63042 |
| 33 | (cost? or costing or costly).ti,ab,kw,kf. | 1527497 |
| 34 | (rate setting? or budget$).ti,ab,kw,kf. | 74321 |
| 35 | (diagnos$ related group? or DRG?).ti,ab,kw,kf. | 42069 |
| 36 | (value adj2 (money or monetary)).ti,ab,kw,kf. | 6354 |
| 37 | Absenteeism/ or Presenteeism/ | 28213 |
| 38 | (absentee* or presentee*).ti,ab,kw,kf. | 19058 |
| 39 | (worker? compensation or workman compensation).ti,ab,kw,kf. | 9163 |
| 40 | presentee*.ti,ab,kw,kf. | 4517 |
| 41 | productivit*.ti,ab,kw,kf. | 144078 |
| 42 | ((disability or illness$ or sickness$ or workplace? or work place? or work time or "time at work" or employment or school* or job or jobs) adj3 (absenc* or absent* or presenc* or present)).ti,ab,kw,kf. | 33148 |
| 43 | (((disability or sickness or work) adj3 (absent$ or absence?)) or (WORKING WHILE ILL working while sick or sickness presence)).ti,ab,kw,kf. | 16965 |
| 44 | ((work* or employ*) adj5 abilit*).ti,ab,kw,kf. | 31078 |
| 45 | ((school* or class* or work) adj3 (attend* or miss*)).ti,ab,kw,kf. | 40988 |
| 46 | (time off or ((time loss or lost time) adj2 (work or employment))).ti,ab,kw,kf. | 5830 |
| 47 | ((time adj1 away) or time away).ti,ab,kw,kf. | 1825 |
| 48 | Sick Leave/ | 12590 |
| 49 | (((sick or medical) adj leave?) or sick time).ti,ab,kw,kf. | 15056 |
| 50 | sick day?.ti,ab,kw,kf. | 1517 |
| 51 | ((income or productivity or salary or salaries or wage or wages) adj3 lost).ti,ab,kw,kf. | 6006 |
| 52 | ((healthcare or health care or resource?) adj3 (utili#ation? or utilise? or utilize? or utili#ing)).ti,ab,kw,kf. | 99798 |
| 53 | Length of Stay/ | 301024 |
| 54 | ((hospital or length) adj2 stay?).ti,ab,kw,kf. | 425054 |
| 55 | ((caregiver* or carer? or family or families or friend? or guardian* or parent* or surrogate? or user or users) adj2 (burden? or burnout? or (burn* adj2 out) or strain*)).ti,ab,kw,kf. | 51894 |
| 56 | or/13-55 [Cost Filter--post PRESS] | 10406383 |
| 57 | 12 and 56 [Results before limits] | 42264 |
| 58 | exp animals/ not humans.sh. | 31501629 |
| 59 | (mice or mouse or pig or pigs or equine or bovine or cow or livestock or rat or rats).ti. | 3265025 |
| 60 | 57 not (or/58-59) [Results excluding animal studies] | 3977 |
| 61 | (201$ or 202$).yr,dp. | 29932084 |
| 62 | english.la. | 59321329 |
| 63 | 60 and 61 and 62 [Medline--Final Results, English, 2010-] | 2673 |
| **64** | **63 use ppez** | **883** |
| 65 | exp amyloidosis/ | 73452 |
| 66 | (beta fibrillosi$ or paraamyloidos$).ti,ab,kw. | 15 |
| 67 | amyloido$.ti,ab,hw,kw. or ((amyloid$ or beta-amyloid$) adj2 plaque?).ti,ab,kw. | 104740 |
| 68 | (light chain adj2 amyloid$).ti,ab,kw. | 5157 |
| 69 | (amyloid adj2 (neuropathy or neuropathies)).ti,ab,kw. | 716 |
| 70 | cerebral amyloid? angiopath$.ti,ab,kw. | 6850 |
| 71 | (abeta adj4 amyloid*).ti,ab,kw. | 48965 |
| 72 | (amyloid$ adj2 (fibril or fibrils or deposit?)).ti,ab,kw. | 31293 |
| 73 | (Famil$ Mediterranean fever? or (muckle wells adj2 (syndrome$ or disease?))).ti,ab,kw. | 9645 |
| 74 | amyloid plaque/ | 11210 |
| 75 | (neuritic plaque? or senile plaque?).ti,ab,kw. | 14847 |
| 76 | or/65-75 [Amyloidosis] | 177687 |
| 77 | exp Economics/ or economic aspect/ | 1003168 |
| 78 | ((markov adj (model? or process or processes)) or monte carlo or decision tree? or decision theor$).ti,ab,kw. | 158289 |
| 79 | pharmacoeconomics/ or health economics/ or "drug cost"/ | 137414 |
| 80 | economic evaluation/ or "cost benefit analysis"/ or "cost control"/ or "cost effectiveness analysis"/ or "cost minimization analysis"/ or "cost of illness"/ or "cost utility analysis"/ or "cost"/ | 568324 |
| 81 | health insurance/ or health economics/ or insurance/ or blue cross blue shield/ or "health plan employer data and information set"/ or medicaid/ or medicare/ or national health insurance/ or prior authorization/ or private health insurance/ or prospective payment/ or prospective pricing/ or public health insurance/ or reimbursement/ or research utilization group/ or universal health insurance/ | 472111 |
| 82 | "billing and claims"/ or budget/ or capital/ or contract/ or financial deficit/ or funding/ or public expenditure/ or exp purchasing/ | 148744 |
| 83 | finance/ | 12607 |
| 84 | absenteeism/ or presenteeism/ or work/ or productivity/ | 130247 |
| 85 | medical leave/ | 7048 |
| 86 | "length of stay"/ | 301024 |
| 87 | resource management/ or resource allocation/ | 40648 |
| 88 | (blue cross or blue shield or economic? or expenditure? or expense or expenses or expensive or fee or fees or financ$ or insurance or medicare or medicaid? or paid or payment? or payer? or payee? or pays or prepaid or pre-paid or prepay$ or pre-pay$ or reimburs$ or (pay adj2 (care or drug? or healthcare or medication? or medicine? or pharma$ or prescription?))).ti,ab,kw. | 1647009 |
| 89 | (pharmacoeconomic* or pharmaco-economic*).ti,ab,kw. | 15482 |
| 90 | (microeconomic? or macroeconomic? or micro-economic? or macro-economic?).ti,ab,kw. | 3494 |
| 91 | (resource? adj2 allocation?).ti,ab,kw. | 28367 |
| 92 | ((utility adj2 (theory or theories)) or easterlin hypothes?s).ti,ab,kw. | 1016 |
| 93 | (payment? or payer? or payee? or pays).ti,ab,kw. | 118815 |
| 94 | (price? or pricing or price-point? or price-set$).ti,ab,kw. | 105438 |
| 95 | remittance?.ti,ab,kw. | 1222 |
| 96 | expropriation?.ti,ab,kw. | 115 |
| 97 | consumption.ti,ab,kw. | 748257 |
| 98 | capital.ti,ab,kw. | 64238 |
| 99 | bankrupt$.ti,ab,kw. | 1641 |
| 100 | debt?.ti,ab,kw. | 10695 |
| 101 | (tax or taxed or taxes or taxation or taxing).ti,ab,kw. | 37573 |
| 102 | (purchase? or purchasing).ti,ab,kw. | 73478 |
| 103 | savings.ti,ab,kw. | 84722 |
| 104 | (managed care or HMO or hmos or health manag$ organi?ation? or health benefit? plan? or health maintenance organi?ation?).ti,ab,kw. | 62545 |
| 105 | (affordable or affordability).ti,ab,kw. | 62763 |
| 106 | (cost? or costing or costly).ti,ab,kw. | 1524914 |
| 107 | (rate setting? or budget$).ti,ab,kw. | 74040 |
| 108 | (diagnos$ related group? or DRG?).ti,ab,kw. | 41852 |
| 109 | (value adj2 (money or monetary)).ti,ab,kw. | 6338 |
| 110 | (absentee* or presentee*).ti,ab,kw. | 19027 |
| 111 | (worker? compensation or workman$ compensation).ti,ab,kw. | 9332 |
| 112 | workman compensation/ | 15581 |
| 113 | *productivity/ | 13133 |
| 114 | productivity.ti,ab,kw. | 141698 |
| 115 | ((disability or illness$ or sickness$ or workplace? or work place? or work time or "time at work" or employment or school* or job or jobs) adj3 (absenc* or absent* or presenc* or present)).ti,ab,kw. | 33048 |
| 116 | (((disability or sickness or work) adj3 (absent$ or absence?)) or (WORKING WHILE ILL working while sick or sickness presence)).ti,ab,kw. | 16873 |
| 117 | ((work* or employ*) adj5 abilit*).ti,ab,kw. | 31013 |
| 118 | ((school* or class* or work) adj3 (attend* or miss*)).ti,ab,kw. | 40965 |
| 119 | (time off or ((time loss or lost time) adj2 (work or employment))).ti,ab,kw. | 5826 |
| 120 | ((time adj1 away) or time away).ti,ab,kw. | 1825 |
| 121 | medical leave/ | 7048 |
| 122 | (((sick or medical) adj leave?) or sick time).ti,ab,kw. | 14803 |
| 123 | sick day?.ti,ab,kw. | 1515 |
| 124 | ((income or salary or salaries or wage or wages) adj3 lost).ti,ab,kw. | 1761 |
| 125 | ((healthcare or health care or resource?) adj3 (utili#ation? or utilise? or utilize? or utili#ing)).ti,ab,kw. | 98858 |
| 126 | *"length of stay"/ | 24659 |
| 127 | ((hospital or length) adj2 stay?).ti,ab,kw. | 424510 |
| 128 | ((caregiver* or carer? or family or families or friend? or guardian* or parent* or surrogate? or user or users) adj2 (burden? or burnout? or (burn* adj2 out) or strain*)).ti,ab,kw. | 51709 |
| 129 | or/77-128 [Costs] | 5366630 |
| 130 | (mice or mouse or pig or pigs or equine or bovine or cow or livestock or rat or rats).ti. | 3265025 |
| 131 | (exp animals/ or exp invertebrate/ or animal experiment/ or animal model/ or animal tissue/ or animal cell/ or nonhuman/) and (human/ or normal human/ or human cell/) | 40994928 |
| 132 | (exp animals/ or exp invertebrate/ or animal experiment/ or animal model/ or animal tissue/ or animal cell/ or nonhuman/) not 131 [NOT with results set] | 12017761 |
| 133 | (and/76,129) not (or/130,132) [Results excluding animal] | 3424 |
| 134 | (201$ or 202$).dp,yr. | 29932084 |
| 135 | english.la. | 59321329 |
| 136 | and/133-135 [Final Results] | 2673 |
| **137** | **136 use oemezd** | **1816** |
| 138 | exp amyloidosis/ | 73452 |
| 139 | amyloido$.ti,ab,hw,kw. or ((amyloid$ or beta-amyloid$) adj2 plaque?).ti,ab,kw. | 104740 |
| 140 | (beta fibrillosi$ or paraamyloidos$).ti,ab,kw. | 15 |
| 141 | ((light chain? or light-chain?) adj2 amyloid$).ti,ab,kw. | 5396 |
| 142 | (amyloid adj2 (neuropathy or neuropathies)).ti,ab,kw. | 716 |
| 143 | cerebral amyloid? angiopath$.ti,ab,kw. | 6850 |
| 144 | (abeta adj4 amyloid*).ti,ab,kw. | 48965 |
| 145 | (amyloid$ adj2 (fibril or fibrils or deposit?)).ti,ab,kw. | 31293 |
| 146 | (Famil$ Mediterranean fever? or (muckle wells adj2 (syndrome$ or disease?))).ti,ab,kw. | 9645 |
| 147 | Plaque, Amyloid/ | 8301 |
| 148 | (neuritic plaque? or senile plaque?).ti,ab,kw. | 14847 |
| 149 | or/138-148 [Amyloidosis] | 177094 |
| 150 | (markov or monte carlo or decision tree? or (blue cross or blue shield or economic? or expenditure? or expense? or expensive or fee or fees or financ$ or insurance or medicare or medicaid? or paid or payment? or payer? or payee? or pays or prepaid or pre-paid or prepay$ or pre-pay$ or reimburs$ or (pay adj2 (care or drug? or healthcare or medication? or medicine? or pharma$ or prescription?))) or (pharmacoeconomic* or pharmaco-economic*) or (microeconomic? or macroeconomic? or micro-economic? or macro-economic?) or (resource? adj2 allocation?) or ((utility adj2 (theory or theories)) or easterlin hypothes?s) or (payment? or payer? or payee? or pays) or (price? or pricing or price-point? or price-set$) or remittance?).ti,ab,kw,hw,sh. | 2515710 |
| 151 | (expropriation? or consumption or capital or bankrupt$ or debt? or (tax or taxed or taxes or taxation or taxing) or (purchase? or purchasing) or savings or (managed care or HMO or hmos or health manag$ organi?ation? or health benefit? plan? or health maintenance organi?ation?) or (affordable or affordability) or (cost? or costing or costly) or (rate setting? or budget$) or (diagnos$ related group? or DRG?) or (value adj2 (money or monetary)) or (absentee* or presentee*)).ti,ab,kw,hw,sh. | 3213851 |
| 152 | (worker? compensation or workman compensation or productivit* or ((disability or illness$ or sickness$ or workplace? or work place? or work time or "time at work" or employment or school* or job or jobs) adj3 (absenc* or absent* or presenc* or present)) or (((disability or sickness or work) adj3 (absent$ or absence?)) or (WORKING WHILE ILL working while sick or sickness presence)) or ((work* or employ*) adj5 abilit*) or ((school* or class* or work) adj3 (attend* or miss*)) or (time off or ((time loss or lost time) adj2 (work or employment))) or ((time adj1 away) or time away) or (((sick or medical) adj leave?) or sick time) or sick day? or ((income or productivity or salary or salaries or wage or wages) adj3 lost) or ((healthcare or health care or resource?) adj3 (utili#ation? or utilise? or utilize? or utili#ing)) or ((hospital or length) adj2 stay?)).ti,ab,kw,hw,sh. | 973622 |
| 153 | ((caregiver* or carer? or family or families or friend? or guardian* or parent* or surrogate? or user or users) adj2 (burden? or burnout? or (burn* adj2 out) or strain*)).ti,ab,kw,hw,sh. | 55834 |
| 154 | or/150-153 [Cost keyword translations] | 5592896 |
| 155 | and/149,154 | 4427 |
| 156 | limit 155 to (yr="2010 -Current" and english language) | 3424 |
| **157** | **156 use cctr** | **42** |
| 158 | (((amyloid$ or beta-amyloid$) adj2 plaque?) or (beta fibrillosi$ or paraamyloidos$) or ((light chain? or light-chain?) adj2 amyloid$) or (amyloid adj2 (neuropathy or neuropathies)) or cerebral amyloid? angiopath$ or (amyloid$ adj2 (fibril or fibrils or deposit?)) or (Famil$ Mediterranean fever? or (muckle wells adj2 (syndrome$ or disease?))) or (neuritic plaque? or senile plaque?) or amyloid$).tw. | 244692 |
| **159** | **158 use clhta,cleed** | **15** |
| **160** | **64 or 137 or 157 or 159** | **2756** |

**Table S10.** Risk of bias assessment of randomized controlled trials.

| Author, Publication Date | Was randomization carried out appropriately? | Was the concealment of treatment allocation adequate? | Were the groups similar at the outset of the study in terms of prognostic factors? | Were the care providers, participants and outcome assessors blind to treatment allocation? | Were there any unexpected imbalances in dropouts between groups? | Is there any evidence to suggest that the authors measured more outcomes than they reported? | Did the analysis include an ITT analysis? If so, was this appropriate and were appropriate methods used to account for missing data? |
| --- | --- | --- | --- | --- | --- | --- | --- |
| Huang, 2014 [12] | Unclear | No | Yes | Noa | No | No | Yes |
| Kastritis, 2020 [14] | Yes | No | Yes | Nob | No | No | Yes |

aCare providers and participants were not deemed blind to treatment allocation; however, limited details were provided regarding the blinding of outcome assessors.
bCare providers and participants were not deemed blind to treatment allocation; however, outcome assessors were blind to treatment allocation.
Note:Risk of bias assessment for RCTs was performed using the NICE clinical effectiveness quality assessment checklist.
Abbreviations: ITT = intention to treat.

**Table S11.** Risk of bias assessment across observational studies (case-control studies)

| Author, Publication Date | Is the Case Definition Adequate? | Representativeness of the Cases | Selection of Controls | Definition of Controls | Comparability of Cases and Controls on the Basis of the Design or Analysis | Ascertainment of Exposure | Same Method of Ascertainment for Cases and Controls | Non-response Rate | Total Score |
| --- | --- | --- | --- | --- | --- | --- | --- | --- | --- |
| Palladini, 2014 [66] | 1 | 1 | 1 | 1 | 2 | 1 | 1 | 1 | 9 |

Note:Risk of bias assessment for comparative observational studies was performed using the Newcastle-Ottawa scale.

**Table S12.** Risk of bias assessment across observational studies (cohort studies).

| Author, Publication Date | Representativeness of the Exposed Cohort | Selection of the Non-Exposed Cohort | Ascertainment of Exposure | Demonstration that Outcome of Interest was Not Present at Start of Study | Comparability of Cohorts on the Basis of the Design or Analysis | Assessment of Outcome | Was Follow-up Long Enough for Outcomes to Occur? | Adequacy of Follow up of Cohorts | Total Score |
| --- | --- | --- | --- | --- | --- | --- | --- | --- | --- |
| Kastritis, 2017 [41] | 1 | 1 | 1 | 1 | 1 | 1 | 1 | 0 | 7 |
| Sayago, 2016 [42] | 1 | 1 | 1 | 1 | 1 | 1 | 0 | 1 | 7 |
| Cornell, 2015 [47] | 1 | 1 | 1 | 1 | 0 | 1 | 1 | 1 | 7 |
| Liu, 2019 [53] | 1 | 1 | 1 | 1 | 1 | 1 | 0 | 1 | 7 |
| Sperry, 2016 [57] | 1 | 1 | 1 | 1 | 1 | 1 | 1 | 1 | 8 |
| Hegenbart, 2017 [63] | 1 | 1 | 1 | 1 | 2 | 1 | 1 | 1 | 9 |
| Kastritis, 2015 [64] | 1 | 1 | 1 | 1 | 1 | 1 | 1 | 1 | 8 |
| Venner, 2014 [65] | 1 | 1 | 1 | 1 | 2 | 1 | 1 | 0 | 8 |
| Palladini, 2014 [68] | 1 | 1 | 1 | 1 | 2 | 1 | 1 | 1 | 9 |
| Gatt, 2016 [71] | 1 | 1 | 1 | 1 | 1 | 1 | 1 | 1 | 8 |
| Kastritis, 2019 [74] | 1 | 1 | 1 | 1 | 2 | 1 | 0 | 0 | 7 |
| Bochtler, 2015 [79] | 1 | 1 | 1 | 1 | 2 | 1 | 0 | 1 | 8 |
| Jain, 2018 [80] | 1 | 1 | 1 | 1 | 1 | 1 | 0a | 0a | 6 |
| Dumas, 2020 [88] | 1 | 1 | 1 | 1 | 2 | 1 | 1 | 0 | 8 |
| Huang, 2021 [89] | 1 | 1 | 1 | 1 | 2 | 1 | 0a | 0a | 7 |

Note: Risk of bias assessment for comparative observational studies was performed using the Newcastle-Ottawa scale.
a Follow-up data was not considered in quality assessment because it corresponded to outcomes evaluated post-ASCT.
Abbreviations: ASCT = autologous stem cell transplant.

**Table S13.** Risk of bias assessment across HRQoL studies
